# Supplementary material for: Association between vitamin D and uterine fibroids: a study protocol of an open-label, randomised controlled trial
Source: PubMed Central journal article supplement — BMJ Open. 2020 Nov 6;10(11):e038709. doi: 10.1136/bmjopen-2020-038709 (PMC7651728; doi:10.1136/bmjopen-2020-038709), 2020-11-06
Supplement: bmjopen-2020-038709.draft_revisions.pdf [file bmjopen-2020-038709.draft_revisions.pdf]

# BMJ Open

BMJ Open is committed to open peer review. As part of this commitment we make the peer review history of every article we publish publicly available.

When an article is published we post the peer reviewers' comments and the authors' responses online. We also post the versions of the paper that were used during peer review. These are the versions that the peer review comments apply to.

The versions of the paper that follow are the versions that were submitted during the peer review process. They are not the versions of record or the final published versions. They should not be cited or distributed as the published version of this manuscript.

BMJ Open is an open access journal and the full, final, typeset and author-corrected version of record of the manuscript is available on our site with no access controls, subscription charges or pay-per-view fees (<http://bmjopen.bmj.com>).

If you have any questions on BMJ Open's open peer review process please email [info.bmjopen@bmj.com](mailto:info.bmjopen@bmj.com)

# BMJ Open

## Association between vitamin D and uterine fibroids: a study protocol of an open-label, randomised controlled trial

|                               |                                                                                                                                                                                                                                                                                                                                                                                                                                          |
|-------------------------------|------------------------------------------------------------------------------------------------------------------------------------------------------------------------------------------------------------------------------------------------------------------------------------------------------------------------------------------------------------------------------------------------------------------------------------------|
| Journal:                      | <i>BMJ Open</i>                                                                                                                                                                                                                                                                                                                                                                                                                          |
| Manuscript ID                 | bmjopen-2020-038709                                                                                                                                                                                                                                                                                                                                                                                                                      |
| Article Type:                 | Protocol                                                                                                                                                                                                                                                                                                                                                                                                                                 |
| Date Submitted by the Author: | 25-Mar-2020                                                                                                                                                                                                                                                                                                                                                                                                                              |
| Complete List of Authors:     | bo, sheng; Wenzhou Medical University Second Affiliated Hospital, Obstetrics and Gynecology<br>Song, Yizuo; Wenzhou Medical University Second Affiliated Hospital, Obstetrics and Gynecology<br>Liu, Yi; Wenzhou Medical University Second Affiliated Hospital, Obstetrics and Gynecology<br>Jiang, Chenchen; Wenzhou Medical University Second Affiliated Hospital, Clinical Research Center<br>Zhu, Xueqiong; Wenzhou Medical College, |
| Keywords:                     | Gynaecological oncology < GYNAECOLOGY, Protocols & guidelines < HEALTH SERVICES ADMINISTRATION & MANAGEMENT, Clinical trials < THERAPEUTICS                                                                                                                                                                                                                                                                                              |
|                               |                                                                                                                                                                                                                                                                                                                                                                                                                                          |

SCHOLARONE™  
Manuscripts

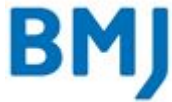

I, the Submitting Author has the right to grant and does grant on behalf of all authors of the Work (as defined in the below author licence), an exclusive licence and/or a non-exclusive licence for contributions from authors who are: i) UK Crown employees; ii) where BMJ has agreed a CC-BY licence shall apply, and/or iii) in accordance with the terms applicable for US Federal Government officers or employees acting as part of their official duties; on a worldwide, perpetual, irrevocable, royalty-free basis to BMJ Publishing Group Ltd ("BMJ") its licensees and where the relevant Journal is co-owned by BMJ to the co-owners of the Journal, to publish the Work in this journal and any other BMJ products and to exploit all rights, as set out in our [licence](#).

The Submitting Author accepts and understands that any supply made under these terms is made by BMJ to the Submitting Author unless you are acting as an employee on behalf of your employer or a postgraduate student of an affiliated institution which is paying any applicable article publishing charge ("APC") for Open Access articles. Where the Submitting Author wishes to make the Work available on an Open Access basis (and intends to pay the relevant APC), the terms of reuse of such Open Access shall be governed by a Creative Commons licence – details of these licences and which [Creative Commons](#) licence will apply to this Work are set out in our licence referred to above.

Other than as permitted in any relevant BMJ Author's Self Archiving Policies, I confirm this Work has not been accepted for publication elsewhere, is not being considered for publication elsewhere and does not duplicate material already published. I confirm all authors consent to publication of this Work and authorise the granting of this licence.

1  
2  
3  
4 **Association between vitamin D and uterine fibroids: a study protocol of an open-**  
5  
6 **label, randomised controlled trial**  
7  
8

9 Bo Sheng<sup>1#</sup>, Yizuo Song<sup>1#</sup>, Yi Liu<sup>1</sup>, Chenchen Jiang<sup>2</sup>, Xueqiong Zhu<sup>1\*</sup>  
10  
11

12  
13 *<sup>1</sup>Department of Obstetrics and Gynecology, the Second Affiliated Hospital of Wenzhou*  
14 *Medical University, Wenzhou, Zhejiang, 325027.*  
15

16  
17 *<sup>2</sup>Clinical Research Center, the Second Affiliated Hospital of Wenzhou Medical*  
18 *University, Wenzhou, Zhejiang, 325027.*  
19  
20

21  
22  
23 #These authors contributed equally to this work.  
24  
25

26  
27 **\*Corresponding author:**  
28

29 Xueqiong Zhu  
30

31 Department of Obstetrics and Gynecology  
32

33 The Second Affiliated Hospital of Wenzhou Medical University  
34

35 No.109 Xueyuan Xi Road, Wenzhou, Zhejiang, 325027  
36

37 E-mail: zjwzzxq@163.com  
38  
39  
40  
41  
42  
43  
44  
45  
46  
47  
48  
49  
50  
51  
52  
53  
54  
55  
56  
57  
58  
59  
60

## Abstract

**Introduction:** Uterine fibroids are the most common pelvic benign tumor with no satisfactory long-term medical treatment. Recent studies have demonstrated that vitamin D significantly inhibited the growth of fibroids in vitro, vivo and a small-sample clinical trial. Therefore, the aim of this randomised clinical trial (RCT) is to evaluate whether supplementation with vitamin D could reduce the risk and inhibit the growth of uterine fibroids in reproductive stage women.

**Methods and analysis:** The open-label, RCT comprises two parts, including part I and part II. In part I, 2230 vitamin D deficiency or vitamin D insufficiency patients without uterine fibroids will be randomly assigned to two groups: intervention group (according to the level of serum 25-hydroxyvitamin D<sub>3</sub>, receive 1600 or 800 IU/d of vitamin D<sub>3</sub> for 2 years) and control group (followed up at the same time points). The incidence of uterine fibroids will be employed to measure the outcome in different groups. In part II, 360 uterine fibroids patients with vitamin D deficiency or vitamin D insufficiency will be randomly assigned to intervention group or control group. According to the level of serum 25-hydroxyvitamin D<sub>3</sub>, 180 patients will receive 1600 or 800 IU/d of vitamin D<sub>3</sub> for 2 years. Control group will receive regular follow-up. The outcome measure will be conducted using the growth of uterine fibroids in each group.

**Ethics and dissemination:** This study has been approved by the institutional review board of the Second Affiliated Hospital of Wenzhou Medical University (No. LCKY2018-35).

**Trial registration number:** ClinicalTrials.Gov, NCT03586947 and NCT03584529. Pre-results.

**Keywords:** Vitamin D; uterine fibroids; randomised clinical trial.

**Strengths and limitations of this study**

1. The results from this RCT will provide new evidences of the efficacy and safety of vitamin D for uterine fibroids patients.
2. One limitation is that the trial is not a double-blind, placebo-controlled trial and implemented in only one hospital.
3. Another limitation is that the trial is implemented in only one hospital in Chinese subjects, which may limits its generalizability.

For peer review only

## Introduction

Uterine fibroids (UFs) are the most common benign tumor of the female genital tract, originating from smooth muscle cells. The prevalence of leiomyomas ranges from 70% to 80% in women by the age of 50.<sup>1</sup> Because most patients with UFs remain asymptomatic, the actual prevalence of UFs is assumed to be much higher than that reported. Based on the ultrasound screening, the incidence for UFs is reported to be 1.278% in Asia and 3.745% in African-American women.<sup>2</sup> The common symptoms of UFs include heavy menstrual bleeding, menstrual disorders and pelvic discomfort.<sup>3</sup> Furthermore, UFs are also associated with infertility and early pregnancy loss. The treatment for UFs depends on the size, location, symptoms, age and reproductive plans. Surgery is still the major treatment for UFs, including hysterectomy, myomectomy and uterine arterial embolization therapy.<sup>1</sup> However, it increases the patients' operative complications and generates huge economic impact on healthcare systems. Except invasive surgical procedure, gonadotropin-releasing hormone agonist (GnRHa)<sup>4</sup> and mifepristone<sup>5</sup> are the most common used medical agents for UFs. When these two drugs are stopped, UFs may re-grow rapidly.<sup>6,7</sup> Thus, GnRHa or mifepristone is usually used for the clinically symptomatic patients who are at a perimenopausal period, or who have contraindications of surgery. It is crucial to find a novel nonsurgical alternative for UFs patients and prevent their occurrence.

Vitamin D is one of the essential nutrients for human bodies. Recent studies have considered that vitamin D is involved in the development of UFs.<sup>7,8,9</sup> Low levels of serum 25-hydroxyvitamin D<sub>3</sub> have been demonstrated to be linked with increased risk of UFs.<sup>10,11</sup> Blauer *et al.*<sup>12</sup> found that the growth of both primary myometrial and leiomyoma cells could be significantly inhibited by 1,25-dihydroxyvitamin D<sub>3</sub> in a concentration-dependent way. Moreover, the process of fibrosis induced by the transforming growth factor- $\beta$ 3 (TGF- $\beta$ 3) could be attenuated by vitamin D in immortalized human UF (HuLM) cells. In addition, vitamin D suppressed the protein expression of plasminogen activator inhibitor-1, which is an important TGF- $\beta$  target in HuLM cells.<sup>13</sup> In vivo studies, Halder *et al.*<sup>14</sup> reported that 1,25-dihydroxyvitamin D<sub>3</sub> decreased fibroid tumor size through the downregulation of proliferation-related genes,

1  
2  
3  
4 antiapoptotic genes, estrogen and progesterone receptors in Eker rats. Moreover, Halder  
5 *et al.*<sup>15</sup> found that the treatment with 1,25-dihydroxyvitamin D<sub>3</sub> or paricalcitol, an  
6 analog of 1,25-dihydroxyvitamin D<sub>3</sub> with lower calcemic activity, could significantly  
7 reduce tumor size in mouse xenograft models of UFs.  
8  
9

10  
11 Our group has demonstrated that serum 25-hydroxyvitamin D<sub>3</sub> level was  
12 significantly lower in patients with UFs as compared to controls. Patients with vitamin  
13 D deficiency had increased risks of UFs (under published). At the same time, an open-  
14 label clinical trial indicated that the supplement of vitamin D in women with UFs  
15 stabilized the growth of fibroids and prevented the onset of its related symptoms.<sup>16</sup> But  
16 it was not a randomised trial and only 108 patients were included in the trial. It is still  
17 unclear whether the supplement of vitamin D could decrease the risk of UFs or inhibit  
18 the growth of UFs.  
19  
20

21  
22 Therefore, the objective of our randomised clinical trial is to evaluate the effect  
23 and safety of administration with vitamin D on decreasing the risk and inhibiting the  
24 development of UFs in reproductive-aged women.  
25  
26

## 27 **Methods and analysis**

### 28 **Study design**

29  
30 This is an open-label, randomised controlled trial. The study contains two parts  
31 (part I and part II) and will be conducted between May 31, 2020 and October 1, 2022  
32 in the Second Affiliated Hospital of Wenzhou Medical University, a hospital in China.  
33 Part I is to investigate the effect of supplementation with vitamin D on the risk of UFs.  
34 Part II is about the association between vitamin D supplementation and the  
35 development of UFs.  
36  
37

### 38 **Part I: association between vitamin D and the risk of UFs**

#### 39 **Study objectives**

40  
41 The primary objective of this part is to assess the efficacy of supplementation with  
42 vitamin D on decreasing the risk of incident UFs within one year and two years. The  
43 secondary objective of this study is to evaluate the safety of supplementation with  
44 vitamin D in subjects.  
45  
46

#### 47 **Trial design**



1  
2  
3  
4 This is an open-label, randomised controlled trial. After signing of informed  
5 consent, vitamin D deficiency patients ( $12 \text{ ng/ml} \leq \text{serum 25-hydroxyvitamin D}_3 < 20$   
6  $\text{ng/ml}$ ) without UFs will be randomly assigned in a 1:1 ratio to either the intervention  
7 group A or the control group B. Intervention group A will receive an oral dose of 1600  
8 IU/day vitamin D<sub>3</sub> for up to 2 years. Control group B will receive 2 years follow-up.  
9  
10 Patients with vitamin D insufficiency ( $20 \text{ ng/ml} \leq \text{Serum 25-hydroxyvitamin D}_3 < 30$   
11  $\text{ng/ml}$ ) without UFs will be randomly assigned in a 1:1 ratio to intervention group C or  
12 control group D. Intervention group C will accept an oral dose of 800 IU/day vitamin  
13 D<sub>3</sub> for up to 2 years. Control group D will receive 2 years follow-up. Gynecologic  
14 ultrasound examinations will be performed every six months. The number, location and  
15 size of the UFs will be documented. The safety of subjects will be evaluated, including  
16 blood routine examination, electrolyte, hepatic and renal function, liver and urinary  
17 system ultrasound, and serum 25-hydroxyvitamin D<sub>3</sub>. Vitamin D receptor genotype of  
18 all patients will also be tested. Vitamin D<sub>3</sub> soft capsules (400 IU per capsule) are  
19 purchased from Sinopharm star shark pharmaceutical (xiamen) co., LTD and can be  
20 preserved for 2 years. An overview of the study design is shown in Figure 1 and Table  
21 1.  
22  
23  
24  
25  
26  
27  
28  
29  
30  
31  
32  
33  
34  
35

### 36 **Sample size**

37  
38 The planned sample size is based on data from a previous study, in which the UFs  
39 incidence was 1.278% per year in Asia and 3.745% per year in African-American  
40 women. Women over the age of 40 years are more likely to have UFs.<sup>2</sup> A study also  
41 revealed that African-American females had lower level of serum 25-hydroxyvitamin  
42 D<sub>3</sub> as compared to Caucasian females.<sup>17</sup> Vitamin D deficiency is shown to increase the  
43 risk of UFs in vitro, vivo animal models and a small-sample clinical trial. We assume  
44 a one-tailed  $\alpha$  error of 0.05 and a power ( $1-\beta$ ) of 0.8. If the rates are 3.745% for the  
45 control group and 1.278% for the intervention group, we allow for a dropout rate of  
46 10% for an effective sample size of 2108 and propose to enroll 2320 participants (580  
47 randomized to each arm).  
48  
49  
50  
51  
52  
53  
54  
55  
56  
57

### 58 **Inclusion criteria**

59 1. Volunteers to participate in the study with informed consent;  
60

2. Married females aged 35-50 who are confirmed with a normal, fibroid-free uterine structure, by means of transvaginal ultrasonography;
3. Serum 25-hydroxyvitamin D<sub>3</sub>  $\geq 12$ ng/ml,  $< 30$  ng/ml.

### **Exclusion criteria**

1. Use of sexual hormone, mifepristone, gonadotropin-releasing hormone agonist (GnRHa), or other medications which are likely to interfere with UFs in the past 3 months;
2. Pregnancy, lactation, postmenopause, or planned pregnancy within two years;
3. Allergic to vitamin D<sub>3</sub> soft capsules;
4. Suspected or identified as other tumors of genital tract;
5. History of hysterectomy or myomectomy;
6. History of osteoporosis or vitamin D deficiency taking vitamin D supplements constantly within previous one month;
7. History of hyperparathyroidism, infectious diseases (tuberculosis, Acquired immunodeficiency syndrome), autoimmune diseases, or digestive system diseases (malabsorption, crohn disease and dysentery);
8. Alanine aminotransferase (ALT) or aspartate transaminase (AST) more than 3 times of the normal upper limit, total bilirubin (TBIL) more than 2 times of the normal upper limit;
9. Creatinine levels  $\geq 1.4$  mg/dL (123 $\mu$ mol/L) or creatinine clearance  $\leq 50$  ml/min;
10. History of malignant tumors;
11. Simultaneous participation in another clinical study with investigational medicinal product(s) or researcher thinks the subjects are not suitable for this trial.

### **Outcomes measures**

The primary outcome is the first diagnosis of UFs in different groups. The secondary outcomes include hypercalcemia, abnormal liver and renal function, and urinary calculus in different groups. Transvaginal ultrasound examinations will be performed by a well-experienced physician in gynecology. If possible, the same examiner should conduct all examinations of a subject and the same ultrasound machine should be used throughout the study.

## Withdrawal

Subjects must be withdrawn from the study when one of the following criteria occurs:

1. At their own request. At any time during the study and without giving reasons, a subject may decline to participate further. The subject will not suffer any disadvantages as a result;
2. In the investigator's opinion, continuation of the study treatment would be harmful to the subject's health;
3. Patients with poor compliance;
4. Lost to follow-up;
5. Pregnancy;
6. Receive other medical treatments which may affect the level of serum 25-hydroxyvitamin D3 or other surgical treatments;
7. The level of serum calcium  $> 3.5$  mmol/L or serum 25-hydroxyvitamin D3  $> 100$  ng/mL.

## Safety assessments

Safety of vitamin D administrated in patients without UFs will be assessed by renal and liver function test, serum electrolyte (sodium, chloride, potassium, calcium, and phosphorus), blood routine test, and serum 25-hydroxyvitamin D3. Urine pregnancy test and serum 25-hydroxyvitamin D3 level will be detected every three months. Other indicators are detected during the period of screening and after the treatment of every six months. Liver and urinary system ultrasound will be conducted after the treatment of 12 months and 24 months. The occurrence of any adverse events in trial participants will be recorded in the case report forms during each patient visit. Patients will be withdrawn who have severe adverse events, as it is unsafe for them to continue the trial. Meanwhile, we will give them relevant medical care and follow them up until the reaction has terminated.

## Part II: Association between vitamin D and the development of UFs.

### Study objectives

The primary objective of this part is to assess the efficacy of supplementation with

1  
2  
3  
4 vitamin D on inhibiting the development of UFs within one year and two years. The  
5 secondary objective of part II is to evaluate the safety of supplementation with vitamin  
6 D in subjects.  
7  
8

### 9 **Trial design**

10  
11 After signing of informed consent, patients with vitamin D deficiency ( $12 \text{ ng/ml}$   
12  $\leq$  Serum 25-hydroxyvitamin  $D_3 < 20 \text{ ng/ml}$ ) and UFs will be randomly assigned in a  
13 1:1 ratio to intervention group A or control group B. Intervention group A will accept  
14 an oral dose of 1600 IU/day vitamin  $D_3$  for up to 2 years. Control group B will receive  
15 2 years follow-up. Patients with vitamin D insufficiency ( $20 \text{ ng/ml} \leq$  Serum 25-  
16 hydroxyvitamin  $D_3 < 30 \text{ ng/ml}$ ) and UFs will be randomly assigned in a 1:1 ratio to  
17 intervention group C or control group D. Intervention group C will accept an oral dose  
18 of 800 IU/day vitamin  $D_3$  for up to 2 years. Control group D will receive 2 years follow-  
19 up. Gynecologic ultrasound examinations will be performed every three months. The  
20 number, location and size of the UFs will be documented (the transverse, longitudinal,  
21 and antero-posterior diameters of fibroids will be documented at each efficacy  
22 ultrasound examination for volume calculation). The safety of vitamin D in subjects  
23 with UFs will be evaluated, including blood routine examination, serum electrolyte,  
24 hepatic and renal function, liver and urinary system ultrasound, and serum 25-  
25 hydroxyvitamin  $D_3$ . Vitamin  $D_3$  soft capsules (400IU per capsale) are purchased from  
26 Sinopharm star shark pharmaceutical (xiamen) co., LTD. An overview of the study  
27 design is shown in Figure 2 and Table 2.  
28  
29  
30  
31  
32  
33  
34  
35  
36  
37  
38  
39  
40  
41  
42  
43  
44

### 45 **Sample size**

46  
47 According to a previous study, the volume of UFs was  $8.2 (2.1-30.5) \text{ cm}^3$  after the  
48 supplement of vitamin D 12 months and  $11.4 (5.5-22.3) \text{ cm}^3$  in the control group after  
49 12 months follow-up, respectively.<sup>16</sup> On the basis of a 0.9 power to detect a significant  
50 difference ( $\alpha=0.05$ , one-sided), 320 participants will be required for the four groups in  
51 a 1:1:1:1 ratio. Allowing for a 10% withdrawal rate, we plan to include 360 patients in  
52 the whole trial (90 randomized to each arm).  
53  
54  
55  
56  
57

### 58 **Inclusion criteria**

59 1. Patients are willing to cooperate with the follow-up and sign informed consent;  
60

2. Married females aged 35-50 who are diagnosed as UFs by transvaginal ultrasonography;
3. The maximum average diameter of intramural myoma is  $\leq 4\text{cm}$ ,  $\geq 1\text{cm}$ ;
4. Serum 25-hydroxyvitamin D<sub>3</sub>  $\geq 12\text{ng/ml}$ ,  $< 30\text{ ng/ml}$ .

### **Exclusion criteria**

1. Patients with heavy menstrual bleeding ( $>80.0\text{ mL}$ ) per menstrual period, menstrual disorders, pelvic discomfort, infertility, or other indications for operation;
2. Patients complicated with leiomyoma degeneration and adenomyosis that were suspected or diagnosed by transvaginal ultrasound or gynecologic examination;
3. Allergic to vitamin D<sub>3</sub> soft capsules;
4. Use of sexual hormone, mifepristone, gonadotropin-releasing hormone agonist (GnRHa), or other medication which is likely to interfere with UFs in the past 3 months;
5. Pregnancy, lactation, postmenopause, or planned pregnancy within two years;
6. Suspected or identified as other tumors of genital tract;
7. History of osteoporosis or vitamin D deficiency taking vitamin D supplements within previous one month;
8. History of autoimmune diseases, infectious diseases (tuberculosis, AIDS), autoimmune diseases, digestive system diseases (malabsorption, crohn disease, and dysentery);
9. Alanine aminotransferase (ALT) or aspartate transaminase (AST) more than 3 times of the normal upper limit, total bilirubin (TBIL) more than 2 times of the normal upper limit;
10. Creatinine levels  $\geq 1.4\text{ mg/dL}$  ( $123\mu\text{mol/L}$ ) or creatinine clearance  $\leq 50\text{ mL/min}$ ;
11. History of malignant tumors;
12. Simultaneous participation in another clinical study with investigational medicinal product(s) or researcher thinks the subjects are not suitable for this trial.

### **Outcomes measures**

Primary outcomes: percent change in volume of the largest fibroid and total fibroids compared to baseline (baseline = last value obtained before randomization; measured by ultrasound examination). The volume of the largest uterine leiomyoma (in

cm<sup>3</sup>) was calculated with the following formula:

$$volume = \frac{4\pi}{3} \times \frac{a}{2} \times \frac{b}{2} \times \frac{c}{2} = \frac{\pi \cdot a \cdot b \cdot c}{6}$$

Secondary outcomes: percentage of subjects undergoing other medical or surgical treatment, hypercalcemia, urinary calculus, abnormal liver and renal function. Transvaginal ultrasound examinations will be performed by a well-experienced gynecologist. If possible, the same examiner should conduct all examinations for each subject throughout the study and the same ultrasound machine should be used throughout the study.

### Withdrawal

Subjects must be withdrawn from the study when one of the following criteria occurs:

1. At their own request. At any time during the study and without giving reasons, a subject may decline to participate further. The subject will not suffer any disadvantages as a result;
2. In the investigator's opinion, continuation of the study treatment would be harmful to the subject's health;
3. Patients with poor compliance;
4. Lost to follow-up;
5. Pregnancy;
6. Other medical or surgical treatments for UFs;
7. Receive other medical treatments which may affect the level of serum 25-hydroxyvitamin D<sub>3</sub> or other surgical treatments;
8. The level of serum calcium > 3.5 mmol/L or serum 25-hydroxyvitamin D<sub>3</sub> > 100 ng/mL.

### Safety assessments

Safety of vitamin D administrated in patients with UFs will be assessed by the same methods as part I.

### Statistical analysis

Statistical analyses will be performed using SPSS version 22.0 for Windows

(SPSS Inc., Chicago, IL, USA). The randomisation sequence is generated by the use of the Random Number Table. The normal distribution of continuous variables is tested by one-sample Kolmogorov-Smirnov test. Continuous variables with normal distribution are reported as mean (standard deviation); non-normal variables are presented as median (interquartile range). Means of 2 and 3 or more continuous normally distributed variables, respectively, are compared by independent samples Student's t test or one-way ANOVA test. Mann-Whitney U test and Kruskal-Wallis test are used, respectively, to compare means of 2 and 3 or more groups of variables that are not normally distributed. The frequencies of categorical variables are compared using Pearson  $\chi^2$  or Fisher's exact test, when appropriate. A value of  $P < 0.05$  is considered statistical significance.

### **Ethics and dissemination**

The study has been approved by the ethics committee of the Second Affiliated Hospital of Wenzhou Medical University (No. LCKY2018-35) and registered in the United States National Institutes of Health Clinical Trials Registry: NCT03586947 and NCT03584529. The procedure will be performed following the principles described in the declaration of Helsinki. We will publish the results of this study in peer-reviewed journals and related websites.

### **No Patient and Public Involvement**

There were no funds or time allocated for patient and public involvement so we were unable to involve patients. We have invited patients to help us develop our dissemination strategy.

### **Discussion**

There is an increasing awareness that vitamin D deficiency is associated with many health outcomes. Up to now, the roles of vitamin D in calcium homeostasis and bone health have been well characterized.<sup>18</sup> In the last decade, it has been recognized that vitamin D also prevented cardiovascular diseases, infections, adverse pregnancy outcomes and tumors.<sup>19 20</sup> Nevertheless, the cut-off thresholds for vitamin D deficiency and optimal levels are still controversial. The guideline of The Endocrine Society suggests vitamin D insufficiency is defined as a serum 25-hydroxyvitamin D<sub>3</sub> of 21–29

1  
2  
3  
4 ng/ml, and vitamin D deficiency as a serum 25-hydroxyvitamin D<sub>3</sub> below 20 ng/ml.  
5  
6 The guideline also recommends that patients with vitamin D deficiency should be  
7  
8 treated with 50,000 IU of vitamin D once a week for 8 weeks to achieve a blood level  
9  
10 of serum 25-hydroxyvitamin D<sub>3</sub> above 30 ng/ml, followed by maintenance therapy of  
11  
12 1500–2000 IU/day. Patients with vitamin D insufficiency require at least 600 IU/day of  
13  
14 vitamin D for the prevention of vitamin D deficiency.<sup>21</sup> In fact, the level of serum 25-  
15  
16 hydroxyvitamin D<sub>3</sub> varies from race to race. It is reported that caucasian females have  
17  
18 higher serum 25-hydroxyvitamin D<sub>3</sub> concentrations than the others.<sup>22 23</sup> According to  
19  
20 the guideline of Institute of Medicine, however, vitamin D deficiency is defined as a  
21  
22 serum 25-hydroxyvitamin D<sub>3</sub> below 12 ng/ml, and vitamin D insufficiency as a serum  
23  
24 25-hydroxyvitamin D<sub>3</sub> of 12-20 ng/ml.<sup>24</sup> Specialists from Osteoporosis Committee of  
25  
26 China Gerontological Society recommend that patients with high risks (history of  
27  
28 osteoporosis, inadequate sun exposure, use of glucocorticoid, etc.) whose blood levels  
29  
30 of serum 25-hydroxyvitamin D<sub>3</sub> are between 12 and 20 ng/ml should receive at least  
31  
32 600 IU/day vitamin D supplementation. Patients with blood levels of serum 25-  
33  
34 hydroxyvitamin D<sub>3</sub> exceed 20 ng/ml could obtain an adequate amount of vitamin D  
35  
36 from dietary sources and sun exposure. It is reported that the single-nucleotide  
37  
38 polymorphisms in vitamin D receptor genes modified the efficacy of vitamin D<sub>3</sub>  
39  
40 supplementation to increase circulating serum 25-hydroxyvitamin D<sub>3</sub> levels.<sup>25</sup> To  
41  
42 determine the potential relationship between them, the vitamin D receptor genotype of  
43  
44 all patients will be tested. Females over the age of 35 years are more likely to suffer  
45  
46 from UFs. Furthermore, post menopause and pregnancy might affect the development  
47  
48 and progression of UFs.<sup>2</sup> So the females aged 35-50 years are chosen in this trial. We  
49  
50 will exclude patients who are pregnant, lactant, postmenopausal, or planned pregnancy  
51  
52 within two years. In this study, patients with vitamin D deficiency or insufficiency will  
53  
54 receive adequate vitamin D supplementation. Dietary vitamin D intake and other  
55  
56 supplements of vitamin D will be limited.

57  
58 In conclusion, this is the first study protocol of an open-label, randomised  
59  
60 controlled trial to evaluate the efficacy and safety of vitamin D supplementation in  
preventing and inhibiting the UFs. However, our study should be interpreted within the



1  
2  
3  
4 context of two limitations. First, the trial is not a double-blind, placebo-controlled trial.  
5  
6 Furthermore, another limitation is that the trial is implemented in only one hospital.  
7  
8 Notwithstanding these limitations, the results from this study will provide new  
9  
10 evidences about vitamin D preparations in UFs from a well-designed trial. Once our  
11  
12 hypothesis is confirmed, this study will provide a more effective, safe, and low-cost  
13  
14 therapy in the prevention and treatment of UFs.  
15  
16

### 17 **Author Contributions**

18  
19 X.Q.Z. is the principal investigator of this study and refined the protocol. B.S. and  
20  
21 Y.Z.S. wrote the manuscript and contributed to the design of the study. B.S. will recruit  
22  
23 the patients and conduct the trial. Y.Z.S., X.Q.Z. and Y.L. will supervise the trial. C.C.J.,  
24  
25 the medical statistician for the study, will contribute to the statistical design and analysis  
26  
27 of data. All authors revised the protocol critically for important intellectual content and  
28  
29 approved the final manuscript.  
30  
31

### 32 **Funding statement**

33  
34 This work was supported by the clinical trial center of the Second Affiliated  
35  
36 Hospital of Wenzhou Medical University (No: SAHoWMU-CR2017-07-101) and grants  
37  
38 from Wenzhou Science and Technology Grant (Y20170604). Sponsors of the study had  
39  
40 no involvement in the collection, analysis, and interpretation of data or the writing of  
41  
42 the manuscript.  
43  
44

### 45 **Competing interests statement**

46  
47 All authors declare that they have no conflict of interest.  
48  
49  
50  
51

52 **Word Count:** 3145  
53  
54  
55

### 56 **REFERENCES**

57  
58 1. Vilos GA, Allaire C, Laberge PY, *et al.* The management of uterine leiomyomas. *J*  
59  
60 *Obstet Gynaecol Can* 2015;37(2):157-78.

2. Stewart EA, Cookson CL, Gandolfo RA, *et al.* Epidemiology of uterine fibroids: a systematic review. *BJOG* 2017;124(10):1501-12.
3. Dagur G, Suh Y, Warren K, *et al.* Urological complications of uterine leiomyoma: a review of literature. *Int Urol Nephrol* 2016;48(6):941-8.
4. Malik M, Britten J, Cox J, *et al.* Gonadotropin-releasing hormone analogues inhibit leiomyoma extracellular matrix despite presence of gonadal hormones. *Fertil Steril* 2016;105(1):214-24.
5. Shen Q, Hua Y, Jiang W, *et al.* Effects of mifepristone on uterine leiomyoma in premenopausal women: a meta-analysis. *Fertil Steril* 2013;100(6):1722-6.e1-10.
6. Shen Q, Shu L, Luo H, *et al.* The use of mifepristone in abortion associated with an increased risk of uterine leiomyomas. *Medicine (Baltimore)* 2017;96(17):e6680.
7. Commandeur AE, Styer AK, Teixeira JM. Epidemiological and genetic clues for molecular mechanisms involved in uterine leiomyoma development and growth. *Hum Reprod Update* 2015;21(5):593-615.
8. Parazzini F, Di Martino M, Candiani M, *et al.* Dietary components and uterine leiomyomas: a review of published data. *Nutr Cancer* 2015;67(4):569-79.
9. Ciebiera M, Łukaszuk K, Męczekalski B, *et al.* Alternative Oral Agents in Prophylaxis and Therapy of Uterine Fibroids-An Up-to-Date Review. *Int J Mol Sci* 2017;18(12). pii: E2586.
10. Baird DD, Hill MC, Schectman JM, *et al.* Vitamin d and the risk of uterine fibroids. *Epidemiology* 2013;24(3):447-53.
11. Ciebiera M, Włodarczyk M, Słabuszewska-Józwiak A, *et al.* Influence of vitamin D and transforming growth factor  $\beta$ 3 serum concentrations, obesity, and family history on the risk for uterine fibroids. *Fertil Steril* 2016;106(7):1787-92.
12. Bläuer M, Rovio PH, Ylikomi T, *et al.* Vitamin D inhibits myometrial and leiomyoma cell proliferation in vitro. *Fertil Steril* 2009;91(5):1919-25.
13. Halder SK, Goodwin JS, Al-Hendy A. 1,25-Dihydroxyvitamin D3 reduces TGF- $\beta$ 3-induced fibrosis-related gene expression in human uterine leiomyoma cells. *J Clin Endocrinol Metab* 2011;96(4):E754-62.
14. Halder SK, Sharan C, Al-Hendy A. 1,25-dihydroxyvitamin D3 treatment shrinks

- uterine leiomyoma tumors in the Eker rat model. *Biol Reprod* 2012;86(4):116.
15. Halder SK, Sharan C, Al-Hendy O, *et al.* Paricalcitol, a vitamin d receptor activator, inhibits tumor formation in a murine model of uterine fibroids. *Reprod Sci* 2014;21(9):1108-19.
16. Ciavattini A, Delli Carpini G, Serri M, *et al.* Hypovitaminosis D and "small burden" uterine fibroids: Opportunity for a vitamin D supplementation. *Medicine (Baltimore)* 2016;95(52):e5698.
17. Brakta S, Diamond JS, Al-Hendy A, *et al.* Role of vitamin D in uterine fibroid biology. *Fertil Steril* 2015;104(3):698-706.
18. Fleet JC. The role of vitamin D in the endocrinology controlling calcium homeostasis. *Mol Cell Endocrinol* 2017;453:36-45.
19. Faridi KF, Lupton JR, Martin SS, *et al.* Vitamin D deficiency and non-lipid biomarkers of cardiovascular risk. *Arch Med Sci* 2017;13(4):732-7.
20. Akoh CC, Pressman EK, Cooper E, *et al.* Low Vitamin D is Associated With Infections and Proinflammatory Cytokines During Pregnancy. *Reprod Sci* 2018;25(3):414-23.
21. Holick MF, Binkley NC, Bischoff-Ferrari HA, *et al.* Evaluation, treatment, and prevention of vitamin D deficiency: an Endocrine Society clinical practice guideline. *J Clin Endocrinol Metab* 2011;96(7):1911-30.
22. Alzaman NS, Dawson-Hughes B, Nelson J, *et al.* Vitamin D status of black and white Americans and changes in vitamin D metabolites after varied doses of vitamin D supplementation. *Am J Clin Nutr* 2016;104(1):205-14.
23. Powe CE, Evans MK, Wenger J, *et al.* Vitamin D-binding protein and vitamin D status of black Americans and white Americans. *N Engl J Med* 2013; 369(21):1991-2000.
24. Aspray TJ, Bowring C, Fraser W, *et al.* National Osteoporosis Society vitamin D guideline summary. *Age Ageing* 2014;43(5):592-5.
25. Barry EL, Rees JR, Peacock JL, *et al.* Genetic variants in CYP2R1, CYP24A1, and VDR modify the efficacy of vitamin D3 supplementation for increasing serum

1  
2  
3  
4 25-hydroxyvitamin D levels in a randomized controlled trial. *J Clin Endocrinol Metab*  
5  
6 2014;99(10):E2133-7.  
7  
8  
9  
10  
11  
12  
13  
14  
15  
16  
17  
18  
19  
20  
21  
22  
23  
24  
25  
26  
27  
28  
29  
30  
31  
32  
33  
34  
35  
36  
37  
38  
39  
40  
41  
42  
43  
44  
45  
46  
47  
48  
49  
50  
51  
52  
53  
54  
55  
56  
57  
58  
59  
60

For peer review only

1  
2  
3  
4 **Figure legends**  
5  
6

7 Figure 1: Flow chart showing the steps of part I in participant recruitment, treatment  
8 and analysis.  
9  
10

11  
12 Figure 2: Flow chart showing the steps of part II in participant recruitment, treatment  
13 and analysis.  
14  
15  
16  
17  
18  
19  
20  
21  
22  
23  
24  
25  
26  
27  
28  
29  
30  
31  
32  
33  
34  
35  
36  
37  
38  
39  
40  
41  
42  
43  
44  
45  
46  
47  
48  
49  
50  
51  
52  
53  
54  
55  
56  
57  
58  
59  
60

For peer review only

**Table 1: Flow chart of the study showing timing collection of different variables.**

| Follow-up (times)                      | 1 | 2 | 3 | 4 | 5  | 6  | 7  | 8  | 9  |
|----------------------------------------|---|---|---|---|----|----|----|----|----|
| Time points (Months)                   | 0 | 3 | 6 | 9 | 12 | 15 | 18 | 21 | 24 |
| Informed consent                       | X |   |   |   |    |    |    |    |    |
| Medical history                        | X |   |   |   |    |    |    |    |    |
| Physical examination                   | X | X | X | X | X  | X  | X  | X  | X  |
| Serum 25-hydroxyvitamin D <sub>3</sub> | X | X | X | X | X  | X  | X  | X  | X  |
| Urine pregnancy test                   | X | X | X | X | X  | X  | X  | X  | X  |
| Gynecologic ultrasound                 | X |   | X |   | X  |    | X  |    | X  |
| Hepatic and renal function             | X |   | X |   | X  |    | X  |    | X  |
| Electrolyte                            | X |   | X |   | X  |    | X  |    | X  |
| Blood routine examination              | X |   | X |   | X  |    | X  |    | X  |
| Liver and urinary                      | X |   |   |   | X  |    |    |    | X  |
| System ultrasound                      |   |   |   |   |    |    |    |    |    |
| Side-effect assessment                 |   | X | X | X | X  | X  | X  | X  | X  |
| Changes in menstruation                |   | X | X | X | X  | X  | X  | X  | X  |
| Adverse event assessment               |   | X | X | X | X  | X  | X  | X  | X  |
| Vitamin D receptor genotype            | X |   |   |   |    |    |    |    |    |

**Table 2: Flow chart of the study showing timing collection of different variables.**

| Follow-up                              | 1 | 2 | 3 | 4 | 5  | 6  | 7  | 8  | 9  |
|----------------------------------------|---|---|---|---|----|----|----|----|----|
| Months                                 | 0 | 3 | 6 | 9 | 12 | 15 | 18 | 21 | 24 |
| Informed consent                       | X |   |   |   |    |    |    |    |    |
| Medical history                        | X |   |   |   |    |    |    |    |    |
| Physical examination                   | X | X | X | X | X  | X  | X  | X  | X  |
| Serum 25-hydroxyvitamin D <sub>3</sub> | X | X | X | X | X  | X  | X  | X  | X  |
| Urine pregnancy test                   | X | X | X | X | X  | X  | X  | X  | X  |
| Gynecologic ultrasound                 | X | X | X | X | X  | X  | X  | X  | X  |
| Hepatic and renal function             | X |   | X |   | X  |    | X  |    | X  |
| Electrolyte                            | X |   | X |   | X  |    | X  |    | X  |
| Blood routine examination              | X |   | X |   | X  |    | X  |    | X  |
| Liver and urinary                      | X |   |   |   | X  |    |    |    | X  |
| System ultrasound                      |   |   |   |   |    |    |    |    |    |
| Side-effect assessment                 |   | X | X | X | X  | X  | X  | X  | X  |
| Changes in menstruation                |   | X | X | X | X  | X  | X  | X  | X  |
| Adverse event assessment               |   | X | X | X | X  | X  | X  | X  | X  |
| Vitamin D receptor genotype            | X |   |   |   |    |    |    |    |    |

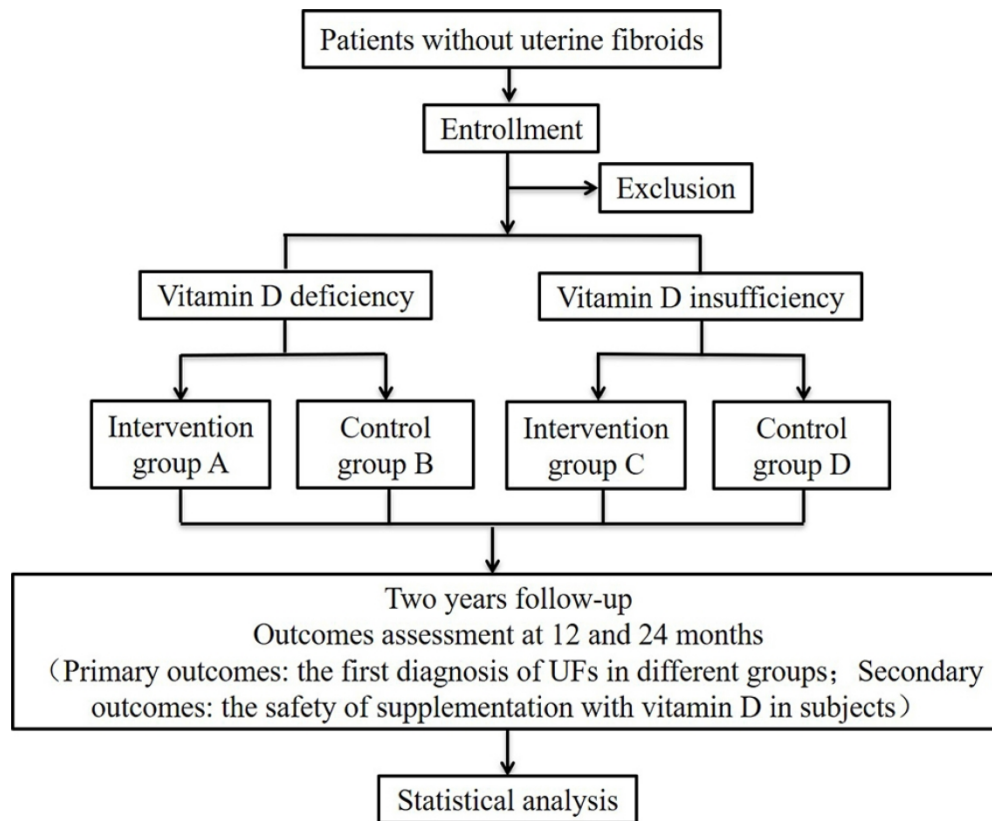

Figure 1: Flow chart showing the steps of part I in participant recruitment, treatment and analysis.

352x291mm (300 x 300 DPI)



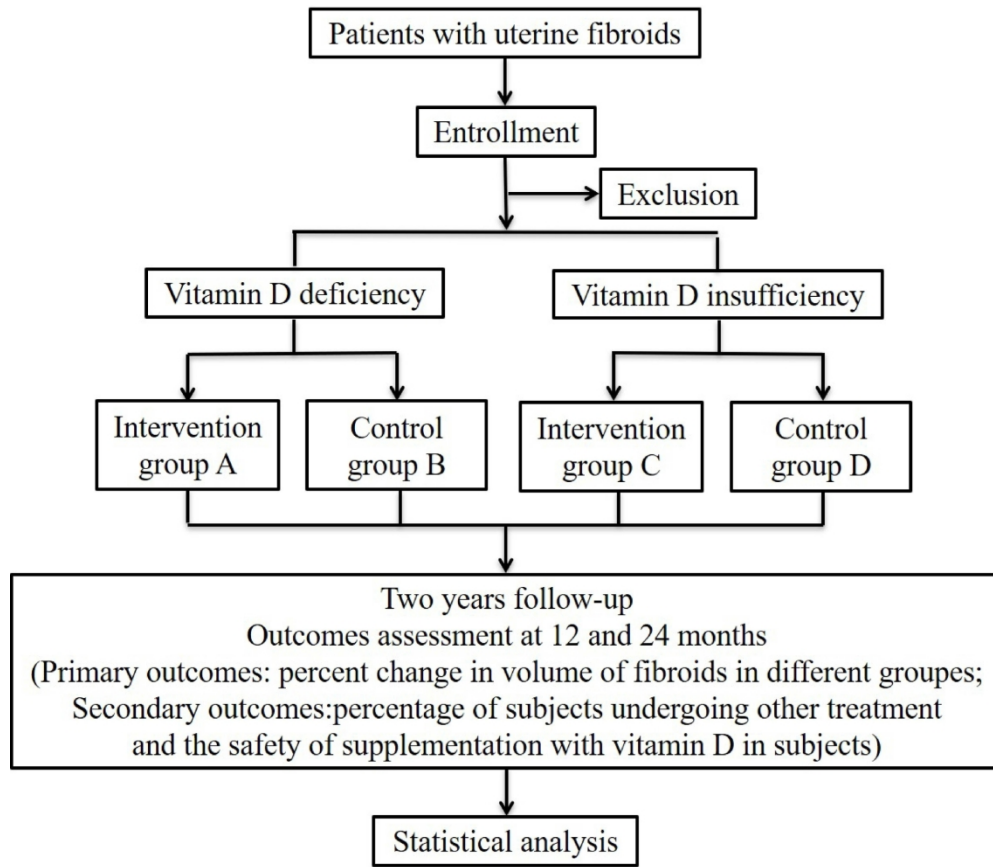

Figure 2: Flow chart showing the steps of part II in participant recruitment, treatment and analysis.

208x181mm (300 x 300 DPI)

# Reporting checklist for protocol of a clinical trial.

Based on the SPIRIT guidelines.

## Instructions to authors

Complete this checklist by entering the page numbers from your manuscript where readers will find each of the items listed below.

Your article may not currently address all the items on the checklist. Please modify your text to include the missing information. If you are certain that an item does not apply, please write "n/a" and provide a short explanation.

Upload your completed checklist as an extra file when you submit to a journal.

In your methods section, say that you used the SPIRIT reporting guidelines, and cite them as:

Chan A-W, Tetzlaff JM, Altman DG, Laupacis A, Gøtzsche PC, Krleža-Jerić K, Hróbjartsson A, Mann H, Dickersin K, Berlin J, Doré C, Parulekar W, Summerskill W, Groves T, Schulz K, Sox H, Rockhold FW, Rennie D, Moher D. SPIRIT 2013 Statement: Defining standard protocol items for clinical trials. *Ann Intern Med.* 2013;158(3):200-207

|                                   |                                                                                                                                 | Page   |
|-----------------------------------|---------------------------------------------------------------------------------------------------------------------------------|--------|
|                                   | Reporting Item                                                                                                                  | Number |
| <b>Administrative information</b> |                                                                                                                                 |        |
| Title                             | <a href="#">#1</a> Descriptive title identifying the study design, population, interventions, and, if applicable, trial acronym | 1      |

|    |                          |                     |                                                              |     |
|----|--------------------------|---------------------|--------------------------------------------------------------|-----|
| 1  | Trial registration       | <a href="#">#2a</a> | Trial identifier and registry name. If not yet registered,   | 2   |
| 2  |                          |                     |                                                              |     |
| 3  |                          |                     | name of intended registry                                    |     |
| 4  |                          |                     |                                                              |     |
| 5  |                          |                     |                                                              |     |
| 6  | Trial registration: data | <a href="#">#2b</a> | All items from the World Health Organization Trial           | n/a |
| 7  | set                      |                     | Registration Data Set                                        |     |
| 8  |                          |                     |                                                              |     |
| 9  |                          |                     |                                                              |     |
| 10 |                          |                     |                                                              |     |
| 11 | Protocol version         | <a href="#">#3</a>  | Date and version identifier                                  | n/a |
| 12 |                          |                     |                                                              |     |
| 13 |                          |                     |                                                              |     |
| 14 |                          |                     |                                                              |     |
| 15 | Funding                  | <a href="#">#4</a>  | Sources and types of financial, material, and other support  | 14  |
| 16 |                          |                     |                                                              |     |
| 17 |                          |                     |                                                              |     |
| 18 | Roles and                | <a href="#">#5a</a> | Names, affiliations, and roles of protocol contributors      | 1   |
| 19 | responsibilities:        |                     |                                                              |     |
| 20 |                          |                     |                                                              |     |
| 21 | contributorship          |                     |                                                              |     |
| 22 |                          |                     |                                                              |     |
| 23 |                          |                     |                                                              |     |
| 24 |                          |                     |                                                              |     |
| 25 |                          |                     |                                                              |     |
| 26 | Roles and                | <a href="#">#5b</a> | Name and contact information for the trial sponsor           | 14  |
| 27 | responsibilities:        |                     |                                                              |     |
| 28 |                          |                     |                                                              |     |
| 29 | sponsor contact          |                     |                                                              |     |
| 30 |                          |                     |                                                              |     |
| 31 | information              |                     |                                                              |     |
| 32 |                          |                     |                                                              |     |
| 33 |                          |                     |                                                              |     |
| 34 |                          |                     |                                                              |     |
| 35 |                          |                     |                                                              |     |
| 36 | Roles and                | <a href="#">#5c</a> | Role of study sponsor and funders, if any, in study design;  | 14  |
| 37 | responsibilities:        |                     | collection, management, analysis, and interpretation of      |     |
| 38 |                          |                     | data; writing of the report; and the decision to submit the  |     |
| 39 | sponsor and funder       |                     | report for publication, including whether they will have     |     |
| 40 |                          |                     | ultimate authority over any of these activities              |     |
| 41 |                          |                     |                                                              |     |
| 42 |                          |                     |                                                              |     |
| 43 |                          |                     |                                                              |     |
| 44 |                          |                     |                                                              |     |
| 45 |                          |                     |                                                              |     |
| 46 |                          |                     |                                                              |     |
| 47 |                          |                     |                                                              |     |
| 48 | Roles and                | <a href="#">#5d</a> | Composition, roles, and responsibilities of the coordinating | n/a |
| 49 | responsibilities:        |                     | centre, steering committee, endpoint adjudication            |     |
| 50 |                          |                     | committee, data management team, and other individuals       |     |
| 51 | committees               |                     | or groups overseeing the trial, if applicable (see Item 21a  |     |
| 52 |                          |                     | for data monitoring committee)                               |     |
| 53 |                          |                     |                                                              |     |
| 54 |                          |                     |                                                              |     |
| 55 |                          |                     |                                                              |     |
| 56 |                          |                     |                                                              |     |
| 57 |                          |                     |                                                              |     |
| 58 |                          |                     |                                                              |     |
| 59 |                          |                     |                                                              |     |
| 60 |                          |                     |                                                              |     |

1 **Introduction**  
2

3  
4 **Background and** [#6a](#) Description of research question and justification for 4  
5  
6 rationale undertaking the trial, including summary of relevant studies  
7 (published and unpublished) examining benefits and harms  
8 for each intervention  
9  
10  
11  
12

13  
14 **Background and** [#6b](#) Explanation for choice of comparators 5  
15  
16 rationale: choice of  
17 comparators  
18  
19  
20

21 **Objectives** [#7](#) Specific objectives or hypotheses 5  
22  
23

24 **Trial design** [#8](#) Description of trial design including type of trial (eg, parallel 5  
25  
26 group, crossover, factorial, single group), allocation ratio,  
27 and framework (eg, superiority, equivalence, non-inferiority,  
28 exploratory)  
29  
30  
31  
32  
33

34 **Methods:**

35 **Participants,**  
36  
37 **interventions, and**  
38  
39 **outcomes**  
40  
41  
42  
43

44 **Study setting** [#9](#) Description of study settings (eg, community clinic, 5  
45  
46 academic hospital) and list of countries where data will be  
47 collected. Reference to where list of study sites can be  
48 obtained  
49  
50  
51  
52

53  
54 **Eligibility criteria** [#10](#) Inclusion and exclusion criteria for participants. If 6, 7, 9,  
55  
56 applicable, eligibility criteria for study centres and 10  
57  
58  
59

|    |                      |                                                                                   |           |
|----|----------------------|-----------------------------------------------------------------------------------|-----------|
| 1  |                      | individuals who will perform the interventions (eg,                               |           |
| 2  |                      |                                                                                   |           |
| 3  |                      | surgeons, psychotherapists)                                                       |           |
| 4  |                      |                                                                                   |           |
| 5  |                      |                                                                                   |           |
| 6  | Interventions:       | <a href="#">#11a</a> Interventions for each group with sufficient detail to allow | 6, 9      |
| 7  |                      |                                                                                   |           |
| 8  | description          | replication, including how and when they will be                                  |           |
| 9  |                      |                                                                                   |           |
| 10 |                      | administered                                                                      |           |
| 11 |                      |                                                                                   |           |
| 12 |                      |                                                                                   |           |
| 13 | Interventions:       | <a href="#">#11b</a> Criteria for discontinuing or modifying allocated            | 6, 9      |
| 14 |                      |                                                                                   |           |
| 15 | modifications        | interventions for a given trial participant (eg, drug dose                        |           |
| 16 |                      | change in response to harms, participant request, or                              |           |
| 17 |                      |                                                                                   |           |
| 18 |                      | improving / worsening disease)                                                    |           |
| 19 |                      |                                                                                   |           |
| 20 |                      |                                                                                   |           |
| 21 |                      |                                                                                   |           |
| 22 |                      |                                                                                   |           |
| 23 | Interventions:       | <a href="#">#11c</a> Strategies to improve adherence to intervention protocols,   | 6, 9      |
| 24 |                      |                                                                                   |           |
| 25 | adherence            | and any procedures for monitoring adherence (eg, drug                             |           |
| 26 |                      |                                                                                   |           |
| 27 |                      | tablet return; laboratory tests)                                                  |           |
| 28 |                      |                                                                                   |           |
| 29 |                      |                                                                                   |           |
| 30 |                      |                                                                                   |           |
| 31 | Interventions:       | <a href="#">#11d</a> Relevant concomitant care and interventions that are         | 6, 9      |
| 32 |                      |                                                                                   |           |
| 33 | concomitant care     | permitted or prohibited during the trial                                          |           |
| 34 |                      |                                                                                   |           |
| 35 |                      |                                                                                   |           |
| 36 | Outcomes             | <a href="#">#12</a> Primary, secondary, and other outcomes, including the         | 7, 10, 11 |
| 37 |                      |                                                                                   |           |
| 38 |                      | specific measurement variable (eg, systolic blood                                 |           |
| 39 |                      |                                                                                   |           |
| 40 |                      | pressure), analysis metric (eg, change from baseline, final                       |           |
| 41 |                      |                                                                                   |           |
| 42 |                      | value, time to event), method of aggregation (eg, median,                         |           |
| 43 |                      |                                                                                   |           |
| 44 |                      | proportion), and time point for each outcome. Explanation                         |           |
| 45 |                      |                                                                                   |           |
| 46 |                      | of the clinical relevance of chosen efficacy and harm                             |           |
| 47 |                      |                                                                                   |           |
| 48 |                      | outcomes is strongly recommended                                                  |           |
| 49 |                      |                                                                                   |           |
| 50 |                      |                                                                                   |           |
| 51 |                      |                                                                                   |           |
| 52 |                      |                                                                                   |           |
| 53 | Participant timeline | <a href="#">#13</a> Time schedule of enrolment, interventions (including any      | Figure 1  |
| 54 |                      |                                                                                   |           |
| 55 |                      | run-ins and washouts), assessments, and visits for                                | and 2     |
| 56 |                      |                                                                                   |           |
| 57 |                      | participants. A schematic diagram is highly recommended                           |           |
| 58 |                      |                                                                                   |           |
| 59 |                      |                                                                                   |           |
| 60 |                      |                                                                                   |           |

|    |                              |                                                                                |      |
|----|------------------------------|--------------------------------------------------------------------------------|------|
|    |                              | (see Figure)                                                                   |      |
| 1  |                              |                                                                                |      |
| 2  |                              |                                                                                |      |
| 3  |                              |                                                                                |      |
| 4  | Sample size                  | <a href="#">#14</a> Estimated number of participants needed to achieve study   | 6, 9 |
| 5  |                              | objectives and how it was determined, including clinical and                   |      |
| 6  |                              | statistical assumptions supporting any sample size                             |      |
| 7  |                              | calculations                                                                   |      |
| 8  |                              |                                                                                |      |
| 9  |                              |                                                                                |      |
| 10 |                              |                                                                                |      |
| 11 |                              |                                                                                |      |
| 12 |                              |                                                                                |      |
| 13 | Recruitment                  | <a href="#">#15</a> Strategies for achieving adequate participant enrolment to | 6, 9 |
| 14 |                              | reach target sample size                                                       |      |
| 15 |                              |                                                                                |      |
| 16 |                              |                                                                                |      |
| 17 |                              |                                                                                |      |
| 18 |                              |                                                                                |      |
| 19 | <b>Methods: Assignment</b>   |                                                                                |      |
| 20 | <b>of interventions (for</b> |                                                                                |      |
| 21 | <b>controlled trials)</b>    |                                                                                |      |
| 22 |                              |                                                                                |      |
| 23 |                              |                                                                                |      |
| 24 |                              |                                                                                |      |
| 25 |                              |                                                                                |      |
| 26 | Allocation: sequence         | <a href="#">#16a</a> Method of generating the allocation sequence (eg,         | 12   |
| 27 | generation                   | computer-generated random numbers), and list of any                            |      |
| 28 |                              | factors for stratification. To reduce predictability of a                      |      |
| 29 |                              | random sequence, details of any planned restriction (eg,                       |      |
| 30 |                              | blocking) should be provided in a separate document that                       |      |
| 31 |                              | is unavailable to those who enrol participants or assign                       |      |
| 32 |                              | interventions                                                                  |      |
| 33 |                              |                                                                                |      |
| 34 |                              |                                                                                |      |
| 35 |                              |                                                                                |      |
| 36 |                              |                                                                                |      |
| 37 |                              |                                                                                |      |
| 38 |                              |                                                                                |      |
| 39 |                              |                                                                                |      |
| 40 |                              |                                                                                |      |
| 41 |                              |                                                                                |      |
| 42 |                              |                                                                                |      |
| 43 | Allocation                   | <a href="#">#16b</a> Mechanism of implementing the allocation sequence (eg,    | 12   |
| 44 | concealment                  | central telephone; sequentially numbered, opaque, sealed                       |      |
| 45 |                              | envelopes), describing any steps to conceal the sequence                       |      |
| 46 |                              | until interventions are assigned                                               |      |
| 47 |                              |                                                                                |      |
| 48 |                              |                                                                                |      |
| 49 |                              |                                                                                |      |
| 50 |                              |                                                                                |      |
| 51 |                              |                                                                                |      |
| 52 |                              |                                                                                |      |
| 53 | Allocation:                  | <a href="#">#16c</a> Who will generate the allocation sequence, who will enrol | 12   |
| 54 | implementation               | participants, and who will assign participants to                              |      |
| 55 |                              | interventions                                                                  |      |
| 56 |                              |                                                                                |      |
| 57 |                              |                                                                                |      |
| 58 |                              |                                                                                |      |
| 59 |                              |                                                                                |      |
| 60 |                              |                                                                                |      |

|    |                        |                      |                                                                |        |
|----|------------------------|----------------------|----------------------------------------------------------------|--------|
| 1  | Blinding (masking)     | <a href="#">#17a</a> | Who will be blinded after assignment to interventions (eg,     | n/a    |
| 2  |                        |                      | trial participants, care providers, outcome assessors, data    |        |
| 3  |                        |                      | analysts), and how                                             |        |
| 4  |                        |                      |                                                                |        |
| 5  |                        |                      |                                                                |        |
| 6  |                        |                      |                                                                |        |
| 7  |                        |                      |                                                                |        |
| 8  | Blinding (masking):    | <a href="#">#17b</a> | If blinded, circumstances under which unblinding is            | n/a    |
| 9  | emergency              |                      | permissible, and procedure for revealing a participant's       |        |
| 10 |                        |                      | allocated intervention during the trial                        |        |
| 11 | unblinding             |                      |                                                                |        |
| 12 |                        |                      |                                                                |        |
| 13 |                        |                      |                                                                |        |
| 14 |                        |                      |                                                                |        |
| 15 |                        |                      |                                                                |        |
| 16 | <b>Methods: Data</b>   |                      |                                                                |        |
| 17 | <b>collection,</b>     |                      |                                                                |        |
| 18 | <b>management, and</b> |                      |                                                                |        |
| 19 | <b>analysis</b>        |                      |                                                                |        |
| 20 |                        |                      |                                                                |        |
| 21 |                        |                      |                                                                |        |
| 22 |                        |                      |                                                                |        |
| 23 |                        |                      |                                                                |        |
| 24 |                        |                      |                                                                |        |
| 25 |                        |                      |                                                                |        |
| 26 | Data collection plan   | <a href="#">#18a</a> | Plans for assessment and collection of outcome, baseline,      | 19, 20 |
| 27 |                        |                      | and other trial data, including any related processes to       |        |
| 28 |                        |                      | promote data quality (eg, duplicate measurements, training     |        |
| 29 |                        |                      | of assessors) and a description of study instruments (eg,      |        |
| 30 |                        |                      | questionnaires, laboratory tests) along with their reliability |        |
| 31 |                        |                      | and validity, if known. Reference to where data collection     |        |
| 32 |                        |                      | forms can be found, if not in the protocol                     |        |
| 33 |                        |                      |                                                                |        |
| 34 |                        |                      |                                                                |        |
| 35 |                        |                      |                                                                |        |
| 36 |                        |                      |                                                                |        |
| 37 |                        |                      |                                                                |        |
| 38 |                        |                      |                                                                |        |
| 39 |                        |                      |                                                                |        |
| 40 |                        |                      |                                                                |        |
| 41 |                        |                      |                                                                |        |
| 42 |                        |                      |                                                                |        |
| 43 | Data collection plan:  | <a href="#">#18b</a> | Plans to promote participant retention and complete follow-    | 19, 20 |
| 44 | retention              |                      | up, including list of any outcome data to be collected for     |        |
| 45 |                        |                      | participants who discontinue or deviate from intervention      |        |
| 46 |                        |                      | protocols                                                      |        |
| 47 |                        |                      |                                                                |        |
| 48 |                        |                      |                                                                |        |
| 49 |                        |                      |                                                                |        |
| 50 |                        |                      |                                                                |        |
| 51 |                        |                      |                                                                |        |
| 52 |                        |                      |                                                                |        |
| 53 | Data management        | <a href="#">#19</a>  | Plans for data entry, coding, security, and storage,           | 19, 20 |
| 54 |                        |                      | including any related processes to promote data quality        |        |
| 55 |                        |                      | (eg, double data entry; range checks for data values).         |        |
| 56 |                        |                      |                                                                |        |
| 57 |                        |                      |                                                                |        |
| 58 |                        |                      |                                                                |        |
| 59 |                        |                      |                                                                |        |
| 60 |                        |                      |                                                                |        |

|    |                            |                                                                                  |        |
|----|----------------------------|----------------------------------------------------------------------------------|--------|
| 1  |                            | Reference to where details of data management                                    |        |
| 2  |                            |                                                                                  |        |
| 3  |                            | procedures can be found, if not in the protocol                                  |        |
| 4  |                            |                                                                                  |        |
| 5  |                            |                                                                                  |        |
| 6  | Statistics: outcomes       | <a href="#">#20a</a> Statistical methods for analysing primary and secondary     | 11, 12 |
| 7  |                            |                                                                                  |        |
| 8  |                            | outcomes. Reference to where other details of the                                |        |
| 9  |                            |                                                                                  |        |
| 10 |                            | statistical analysis plan can be found, if not in the protocol                   |        |
| 11 |                            |                                                                                  |        |
| 12 |                            |                                                                                  |        |
| 13 | Statistics: additional     | <a href="#">#20b</a> Methods for any additional analyses (eg, subgroup and       | 11, 12 |
| 14 |                            |                                                                                  |        |
| 15 | analyses                   | adjusted analyses)                                                               |        |
| 16 |                            |                                                                                  |        |
| 17 |                            |                                                                                  |        |
| 18 | Statistics: analysis       | <a href="#">#20c</a> Definition of analysis population relating to protocol non- | 11, 12 |
| 19 |                            |                                                                                  |        |
| 20 | population and             | adherence (eg, as randomised analysis), and any statistical                      |        |
| 21 |                            |                                                                                  |        |
| 22 | missing data               | methods to handle missing data (eg, multiple imputation)                         |        |
| 23 |                            |                                                                                  |        |
| 24 |                            |                                                                                  |        |
| 25 |                            |                                                                                  |        |
| 26 | <b>Methods: Monitoring</b> |                                                                                  |        |
| 27 |                            |                                                                                  |        |
| 28 |                            |                                                                                  |        |
| 29 | Data monitoring:           | <a href="#">#21a</a> Composition of data monitoring committee (DMC);             | n/a    |
| 30 |                            |                                                                                  |        |
| 31 | formal committee           | summary of its role and reporting structure; statement of                        |        |
| 32 |                            |                                                                                  |        |
| 33 |                            | whether it is independent from the sponsor and competing                         |        |
| 34 |                            |                                                                                  |        |
| 35 |                            | interests; and reference to where further details about its                      |        |
| 36 |                            |                                                                                  |        |
| 37 |                            | charter can be found, if not in the protocol. Alternatively, an                  |        |
| 38 |                            |                                                                                  |        |
| 39 |                            | explanation of why a DMC is not needed                                           |        |
| 40 |                            |                                                                                  |        |
| 41 |                            |                                                                                  |        |
| 42 |                            |                                                                                  |        |
| 43 |                            |                                                                                  |        |
| 44 | Data monitoring:           | <a href="#">#21b</a> Description of any interim analyses and stopping            | n/a    |
| 45 |                            |                                                                                  |        |
| 46 | interim analysis           | guidelines, including who will have access to these interim                      |        |
| 47 |                            |                                                                                  |        |
| 48 |                            | results and make the final decision to terminate the trial                       |        |
| 49 |                            |                                                                                  |        |
| 50 |                            |                                                                                  |        |
| 51 | Harms                      | <a href="#">#22</a> Plans for collecting, assessing, reporting, and managing     | n/a    |
| 52 |                            |                                                                                  |        |
| 53 |                            | solicited and spontaneously reported adverse events and                          |        |
| 54 |                            |                                                                                  |        |
| 55 |                            | other unintended effects of trial interventions or trial                         |        |
| 56 |                            |                                                                                  |        |
| 57 |                            |                                                                                  |        |
| 58 |                            |                                                                                  |        |
| 59 |                            |                                                                                  |        |
| 60 |                            |                                                                                  |        |



|    |                      |                                                                                  |        |
|----|----------------------|----------------------------------------------------------------------------------|--------|
| 1  |                      | conduct                                                                          |        |
| 2  |                      |                                                                                  |        |
| 3  |                      |                                                                                  |        |
| 4  | Auditing             | <a href="#">#23</a> Frequency and procedures for auditing trial conduct, if any, | n/a    |
| 5  |                      | and whether the process will be independent from                                 |        |
| 6  |                      | investigators and the sponsor                                                    |        |
| 7  |                      |                                                                                  |        |
| 8  |                      |                                                                                  |        |
| 9  |                      |                                                                                  |        |
| 10 |                      |                                                                                  |        |
| 11 | <b>Ethics and</b>    |                                                                                  |        |
| 12 |                      |                                                                                  |        |
| 13 | <b>dissemination</b> |                                                                                  |        |
| 14 |                      |                                                                                  |        |
| 15 |                      |                                                                                  |        |
| 16 | Research ethics      | <a href="#">#24</a> Plans for seeking research ethics committee / institutional  | 12     |
| 17 | approval             | review board (REC / IRB) approval                                                |        |
| 18 |                      |                                                                                  |        |
| 19 | Protocol             | <a href="#">#25</a> Plans for communicating important protocol modifications     | n/a    |
| 20 | amendments           | (eg, changes to eligibility criteria, outcomes, analyses) to                     |        |
| 21 |                      | relevant parties (eg, investigators, REC / IRBs, trial                           |        |
| 22 |                      | participants, trial registries, journals, regulators)                            |        |
| 23 |                      |                                                                                  |        |
| 24 | Consent or assent    | <a href="#">#26a</a> Who will obtain informed consent or assent from potential   | 6, 9   |
| 25 |                      | trial participants or authorised surrogates, and how (see                        |        |
| 26 |                      | Item 32)                                                                         |        |
| 27 |                      |                                                                                  |        |
| 28 |                      |                                                                                  |        |
| 29 | Consent or assent:   | <a href="#">#26b</a> Additional consent provisions for collection and use of     | n/a    |
| 30 | ancillary studies    | participant data and biological specimens in ancillary                           |        |
| 31 |                      | studies, if applicable                                                           |        |
| 32 |                      |                                                                                  |        |
| 33 |                      |                                                                                  |        |
| 34 | Confidentiality      | <a href="#">#27</a> How personal information about potential and enrolled        | 19, 20 |
| 35 |                      | participants will be collected, shared, and maintained in                        |        |
| 36 |                      | order to protect confidentiality before, during, and after the                   |        |
| 37 |                      | trial                                                                            |        |
| 38 |                      |                                                                                  |        |
| 39 |                      |                                                                                  |        |
| 40 | Declaration of       | <a href="#">#28</a> Financial and other competing interests for principal        | 14     |
| 41 |                      |                                                                                  |        |
| 42 |                      |                                                                                  |        |
| 43 |                      |                                                                                  |        |
| 44 |                      |                                                                                  |        |
| 45 |                      |                                                                                  |        |
| 46 |                      |                                                                                  |        |
| 47 |                      |                                                                                  |        |
| 48 |                      |                                                                                  |        |
| 49 |                      |                                                                                  |        |
| 50 |                      |                                                                                  |        |
| 51 |                      |                                                                                  |        |
| 52 |                      |                                                                                  |        |
| 53 |                      |                                                                                  |        |
| 54 |                      |                                                                                  |        |
| 55 |                      |                                                                                  |        |
| 56 |                      |                                                                                  |        |
| 57 |                      |                                                                                  |        |
| 58 |                      |                                                                                  |        |
| 59 |                      |                                                                                  |        |
| 60 |                      |                                                                                  |        |

|    |                       |                      |                                                                 |     |
|----|-----------------------|----------------------|-----------------------------------------------------------------|-----|
| 1  | interests             |                      | investigators for the overall trial and each study site         |     |
| 2  |                       |                      |                                                                 |     |
| 3  |                       |                      |                                                                 |     |
| 4  | Data access           | <a href="#">#29</a>  | Statement of who will have access to the final trial dataset,   | 14  |
| 5  |                       |                      | and disclosure of contractual agreements that limit such        |     |
| 6  |                       |                      | access for investigators                                        |     |
| 7  |                       |                      |                                                                 |     |
| 8  |                       |                      |                                                                 |     |
| 9  |                       |                      |                                                                 |     |
| 10 |                       |                      |                                                                 |     |
| 11 | Ancillary and post    | <a href="#">#30</a>  | Provisions, if any, for ancillary and post-trial care, and for  | n/a |
| 12 |                       |                      | compensation to those who suffer harm from trial                |     |
| 13 | trial care            |                      | participation                                                   |     |
| 14 |                       |                      |                                                                 |     |
| 15 |                       |                      |                                                                 |     |
| 16 |                       |                      |                                                                 |     |
| 17 |                       |                      |                                                                 |     |
| 18 |                       |                      |                                                                 |     |
| 19 | Dissemination policy: | <a href="#">#31a</a> | Plans for investigators and sponsor to communicate trial        | 14  |
| 20 |                       |                      | results to participants, healthcare professionals, the public,  |     |
| 21 | trial results         |                      | and other relevant groups (eg, via publication, reporting in    |     |
| 22 |                       |                      | results databases, or other data sharing arrangements),         |     |
| 23 |                       |                      | including any publication restrictions                          |     |
| 24 |                       |                      |                                                                 |     |
| 25 |                       |                      |                                                                 |     |
| 26 |                       |                      |                                                                 |     |
| 27 |                       |                      |                                                                 |     |
| 28 |                       |                      |                                                                 |     |
| 29 |                       |                      |                                                                 |     |
| 30 |                       |                      |                                                                 |     |
| 31 | Dissemination policy: | <a href="#">#31b</a> | Authorship eligibility guidelines and any intended use of       | 14  |
| 32 |                       |                      | professional writers                                            |     |
| 33 | authorship            |                      |                                                                 |     |
| 34 |                       |                      |                                                                 |     |
| 35 |                       |                      |                                                                 |     |
| 36 | Dissemination policy: | <a href="#">#31c</a> | Plans, if any, for granting public access to the full protocol, | n/a |
| 37 |                       |                      | participant-level dataset, and statistical code                 |     |
| 38 | reproducible research |                      |                                                                 |     |
| 39 |                       |                      |                                                                 |     |
| 40 |                       |                      |                                                                 |     |
| 41 |                       |                      |                                                                 |     |
| 42 | <b>Appendices</b>     |                      |                                                                 |     |
| 43 |                       |                      |                                                                 |     |
| 44 |                       |                      |                                                                 |     |
| 45 | Informed consent      | <a href="#">#32</a>  | Model consent form and other related documentation given        | n/a |
| 46 |                       |                      | to participants and authorised surrogates                       |     |
| 47 | materials             |                      |                                                                 |     |
| 48 |                       |                      |                                                                 |     |
| 49 |                       |                      |                                                                 |     |
| 50 | Biological specimens  | <a href="#">#33</a>  | Plans for collection, laboratory evaluation, and storage of     | n/a |
| 51 |                       |                      | biological specimens for genetic or molecular analysis in       |     |
| 52 |                       |                      | the current trial and for future use in ancillary studies, if   |     |
| 53 |                       |                      | applicable                                                      |     |
| 54 |                       |                      |                                                                 |     |
| 55 |                       |                      |                                                                 |     |
| 56 |                       |                      |                                                                 |     |
| 57 |                       |                      |                                                                 |     |
| 58 |                       |                      |                                                                 |     |
| 59 |                       |                      |                                                                 |     |
| 60 |                       |                      |                                                                 |     |

## Notes:

- 10: 6, 7, 9, 10 The SPIRIT checklist is distributed under the terms of the Creative Commons Attribution License CC-BY-ND 3.0. This checklist was completed on 20. March 2020 using <https://www.goodreports.org/>, a tool made by the [EQUATOR Network](#) in collaboration with [Penelope.ai](#)

For peer review only

# BMJ Open

## Association between vitamin D and uterine fibroids: a study protocol of an open-label, randomised controlled trial

|                                 |                                                                                                                                                                                                                                                                                                                                                                                                                                          |
|---------------------------------|------------------------------------------------------------------------------------------------------------------------------------------------------------------------------------------------------------------------------------------------------------------------------------------------------------------------------------------------------------------------------------------------------------------------------------------|
| Journal:                        | <i>BMJ Open</i>                                                                                                                                                                                                                                                                                                                                                                                                                          |
| Manuscript ID                   | bmjopen-2020-038709.R1                                                                                                                                                                                                                                                                                                                                                                                                                   |
| Article Type:                   | Protocol                                                                                                                                                                                                                                                                                                                                                                                                                                 |
| Date Submitted by the Author:   | 15-Jun-2020                                                                                                                                                                                                                                                                                                                                                                                                                              |
| Complete List of Authors:       | bo, sheng; Wenzhou Medical University Second Affiliated Hospital, Obstetrics and Gynecology<br>Song, Yizuo; Wenzhou Medical University Second Affiliated Hospital, Obstetrics and Gynecology<br>Liu, Yi; Wenzhou Medical University Second Affiliated Hospital, Obstetrics and Gynecology<br>Jiang, Chenchen; Wenzhou Medical University Second Affiliated Hospital, Clinical Research Center<br>Zhu, Xueqiong; Wenzhou Medical College, |
| <b>Primary Subject Heading</b>: | Obstetrics and gynaecology                                                                                                                                                                                                                                                                                                                                                                                                               |
| Secondary Subject Heading:      | Obstetrics and gynaecology, Oncology, Research methods                                                                                                                                                                                                                                                                                                                                                                                   |
| Keywords:                       | Gynaecological oncology < GYNAECOLOGY, Protocols & guidelines < HEALTH SERVICES ADMINISTRATION & MANAGEMENT, Clinical trials < THERAPEUTICS                                                                                                                                                                                                                                                                                              |
|                                 |                                                                                                                                                                                                                                                                                                                                                                                                                                          |

SCHOLARONE™  
Manuscripts



I, the Submitting Author has the right to grant and does grant on behalf of all authors of the Work (as defined in the below author licence), an exclusive licence and/or a non-exclusive licence for contributions from authors who are: i) UK Crown employees; ii) where BMJ has agreed a CC-BY licence shall apply, and/or iii) in accordance with the terms applicable for US Federal Government officers or employees acting as part of their official duties; on a worldwide, perpetual, irrevocable, royalty-free basis to BMJ Publishing Group Ltd ("BMJ") its licensees and where the relevant Journal is co-owned by BMJ to the co-owners of the Journal, to publish the Work in this journal and any other BMJ products and to exploit all rights, as set out in our [licence](#).

The Submitting Author accepts and understands that any supply made under these terms is made by BMJ to the Submitting Author unless you are acting as an employee on behalf of your employer or a postgraduate student of an affiliated institution which is paying any applicable article publishing charge ("APC") for Open Access articles. Where the Submitting Author wishes to make the Work available on an Open Access basis (and intends to pay the relevant APC), the terms of reuse of such Open Access shall be governed by a Creative Commons licence – details of these licences and which [Creative Commons](#) licence will apply to this Work are set out in our licence referred to above.

Other than as permitted in any relevant BMJ Author's Self Archiving Policies, I confirm this Work has not been accepted for publication elsewhere, is not being considered for publication elsewhere and does not duplicate material already published. I confirm all authors consent to publication of this Work and authorise the granting of this licence.

1  
2  
3  
4 **Association between vitamin D and uterine fibroids: a study protocol of an**  
5  
6 **open-label, randomised controlled trial**  
7  
8

9 Bo Sheng<sup>1#</sup>, Yizuo Song<sup>1#</sup>, Yi Liu<sup>1</sup>, Chenchen Jiang<sup>2</sup>, Xueqiong Zhu<sup>1\*</sup>  
10  
11

12  
13 *<sup>1</sup>Department of Obstetrics and Gynecology, the Second Affiliated Hospital of*  
14 *Wenzhou Medical University, Wenzhou, Zhejiang, 325027.*  
15

16  
17 *<sup>2</sup>Clinical Research Center, the Second Affiliated Hospital of Wenzhou Medical*  
18 *University, Wenzhou, Zhejiang, 325027.*  
19  
20

21  
22  
23 #These authors contributed equally to this work.  
24  
25

26  
27 **\*Corresponding author:**  
28

29 Xueqiong Zhu  
30

31 Department of Obstetrics and Gynecology  
32

33 The Second Affiliated Hospital of Wenzhou Medical University  
34

35 No.109 Xueyuan Xi Road, Wenzhou, Zhejiang, 325027  
36

37 E-mail: zjwzzxq@163.com  
38  
39  
40  
41  
42  
43  
44  
45  
46  
47  
48  
49  
50  
51  
52  
53  
54  
55  
56  
57  
58  
59  
60

## Abstract

**Introduction:** Uterine fibroids are the most common pelvic benign tumor with no satisfactory long-term medical treatment. Recent studies have demonstrated that vitamin D significantly inhibited the growth of fibroids in vitro, vivo and a small-sample clinical trial. Therefore, the aim of this randomised clinical trial (RCT) is to evaluate whether supplementation with vitamin D could reduce the risk and inhibit the growth of uterine fibroids in reproductive stage women.

**Methods and analysis:** The open-label, RCT comprises two parts, including part I and part II. In part I, 2230 vitamin D deficiency or vitamin D insufficiency patients without uterine fibroids will be randomly assigned to two groups: intervention group (according to the level of serum 25-hydroxyvitamin D<sub>3</sub>, receive 1600 or 800 IU/d of vitamin D<sub>3</sub> for 2 years) and control group (followed up at the same time points). By using gynecologic ultrasound examinations, the incidence of uterine fibroids will be employed to measure the outcome in different groups. In part II, 360 uterine fibroids patients with vitamin D deficiency or vitamin D insufficiency will be randomly assigned to intervention group or control group. According to the level of serum 25-hydroxyvitamin D<sub>3</sub>, 180 patients will receive 1600 or 800 IU/d of vitamin D<sub>3</sub> for 2 years. Control group will receive regular follow-up. The outcome measure will be conducted using gynecologic ultrasound examinations to detect the growth of uterine fibroids in each group.

**Ethics and dissemination:** This study has been approved by the institutional review board of the Second Affiliated Hospital of Wenzhou Medical University (No. LCKY2018-35).

**Trial registration number:** ClinicalTrials.Gov, NCT03586947 and NCT03584529. Pre-results.

**Keywords:** Vitamin D; uterine fibroids; randomised clinical trial.

### **Strengths and limitations of this study**

1. The results from this RCT will provide new evidences of the efficacy and safety of vitamin D for uterine fibroids patients.
2. One limitation is that the trial is not a double-blind, placebo-controlled trial and implemented in only one hospital.
3. Another limitation is that the trial is implemented in only one hospital in Chinese subjects, which may limit its generalizability.

For peer review only



## Introduction

Uterine fibroids (UFs) are the most common benign tumor of the female genital tract, originating from smooth muscle cells.<sup>1</sup> Due to diverse diagnostic methods and the population source in many epidemiologic studies, the incidence of leiomyomas ranges from 5.4% to 77% of women in their reproductive years.<sup>1</sup> Because most patients with UFs remain asymptomatic, the actual incidence of UFs is assumed to be much higher than that reported. Based on the ultrasound screening, the incidence for UFs is reported to be 1.278% in Asia and 3.745% in African-American women per year.<sup>1</sup> The common symptoms of UFs include heavy menstrual bleeding, menstrual disorders and pelvic discomfort.<sup>2</sup> Furthermore, UFs are also associated with infertility and early pregnancy loss. The treatment for UFs depends on the size, location, symptoms, age and reproductive plans. Surgery is still the major treatment for symptomatic UFs including hysterectomy and myomectomy.<sup>3 4</sup> Uterine arterial embolization (UAE), one of the conservative interventional treatments with the longest track record, has become the major second line option for UFs patients who are properly selected.<sup>3 4</sup> However, these therapies increase the patients' operative complications and generates huge economic impact on healthcare systems. Except invasive surgical procedure, gonadotropin-releasing hormone agonist (GnRHa)<sup>5 6</sup> (eg, leuprorelin) and mifepristone<sup>7 8</sup> are the most commonly used medical agents for UFs in China. When these two drugs are stopped, UFs may re-grow rapidly.<sup>9 10</sup> Thus, GnRHa or mifepristone is usually used for the clinically symptomatic patients who are at a perimenopausal period, or who have contraindications of surgery. Selective progesterone receptor modulators (SPRMs) act by linkage with progesterone receptors in the smooth muscle of UFs, leading to inhibition of cell proliferation.<sup>11</sup> In fact, mifepristone is the first SPRM approved to treat UFs.<sup>12</sup> In addition to mifepristone, four types of SPRMs have been developed including asoprisnil, telapristone acetate, ulipristal acetate and vilaprisan.<sup>13</sup> However, these four SPRMs have not been licensed in China to date and are still being investigated in human clinical trials.<sup>14</sup> Therefore, it is still paramount to finding a novel nonsurgical alternative for UFs patients and prevent their occurrence.

1  
2  
3  
4 Vitamin D is one of the essential nutrients for human bodies. Recent studies have  
5 considered that vitamin D is involved in the development of UFs.<sup>10 15 16</sup> For example,  
6 two groups have demonstrated that low levels of serum 25-hydroxyvitamin D<sub>3</sub> are  
7 linked with increased risk of UFs.<sup>17 18</sup> Blauer *et al.*<sup>19</sup> found that the growth of both  
8 primary myometrial and leiomyoma cells could be inhibited by  
9 1,25-dihydroxyvitamin D<sub>3</sub> in a concentration-dependent way. Moreover, the process  
10 of fibrosis induced by the transforming growth factor-β3 (TGF-β3) could be  
11 attenuated by vitamin D in immortalized human UFs (HuLM) cells. In addition,  
12 vitamin D suppressed the protein expression of plasminogen activator inhibitor-1,  
13 which is an important TGF-β target in HuLM cells.<sup>20</sup> Such inhibitory effect of vitamin  
14 D on UFs is also verified in several *in vivo* studies. Halder *et al.*<sup>21</sup> reported that  
15 1,25-dihydroxyvitamin D<sub>3</sub> decreased fibroid tumor size through downregulation of  
16 proliferation-related genes, antiapoptotic genes, estrogen and progesterone receptors  
17 in Eker rats. Two years later, Halder *et al.*<sup>22</sup> further found that the treatment with  
18 1,25-dihydroxyvitamin D<sub>3</sub> or paricalcitol, an analog of 1,25-dihydroxyvitamin D<sub>3</sub>  
19 with lower calcemic activity, could reduce tumor size in mouse xenograft models of  
20 UFs. Most recently, one study by Corachan *et al.*<sup>23</sup> demonstrated that vitamin D  
21 inhibited the proliferation of human primary uterine leiomyoma cells via cell growth  
22 arrest induction and Wnt/β-catenin pathway downregulation. Furthermore, long-term  
23 vitamin D treatment significantly decreased the uterine leiomyoma size in a xenograft  
24 ovariectomized NOD-SCID mouse model,<sup>24</sup> which confirmed the inhibitory effect of  
25 vitamin D on UFs growth *in vivo*.

26  
27  
28  
29  
30  
31  
32  
33  
34  
35  
36  
37  
38  
39  
40  
41  
42  
43  
44  
45  
46  
47  
48  
49  
50  
51  
52  
53  
54  
55  
56  
57  
58  
59  
60  
Our group has demonstrated that serum 25-hydroxyvitamin D<sub>3</sub> level was  
significantly lower in patients with UFs as compared to controls. In addition, patients  
with vitamin D deficiency had increased risks of UFs.<sup>25</sup> An open-label clinical trial  
indicated that the supplement of vitamin D in women with UFs stabilized the growth  
of fibroids and prevented the onset of its related symptoms.<sup>26</sup> But it was not a  
randomised trial and only 108 patients were included in the trial. A recently published  
randomized clinical trial found that vitamin D consumption did not significantly  
decrease the volume of fibroids in experimental group compared with control group.<sup>27</sup>

1  
2  
3  
4 However, this new trial was completed shortly with a follow-up period of only 12  
5 weeks. Hence, it is still unclear whether long-term supplementation of vitamin D  
6 could decrease the risk or inhibit the growth of UFs.  
7  
8

9 Therefore, we aim to conduct a randomised clinical trial and evaluate the effect  
10 and safety of administration with vitamin D on decreasing the risk and inhibiting the  
11 development of UFs in reproductive-aged women.  
12  
13

## 14 **Methods and analysis**

### 15 **Study design**

16  
17 This is an open-label, randomised controlled trial. The study contains two parts  
18 (part I and part II) and will be conducted between May 31, 2020 and October 1, 2022  
19 in the Second Affiliated Hospital of Wenzhou Medical University, a hospital in  
20 China. Part I is to investigate the effect of supplementation with vitamin D on the risk  
21 of UFs. Part II is about the association between vitamin D supplementation and the  
22 development of UFs. The regimen of vitamin D doses from several international  
23 guidelines and important published clinical trials are listed in Table 1.  
24  
25  
26  
27  
28  
29  
30  
31  
32

### 33 **Part I: Efficacy of vitamin D on the risk of UFs**

#### 34 **Study objectives**

35  
36 The primary objective of this part is to assess the efficacy of supplementation  
37 with vitamin D on decreasing the risk of incident UFs within one year and two years.  
38 The secondary objective of this study is to evaluate the safety of supplementation with  
39 vitamin D in subjects.  
40  
41  
42  
43

#### 44 **Trial design**

45  
46 This is an open-label, randomised controlled trial. After signing of informed  
47 consent, vitamin D deficiency patients ( $12 \text{ ng/ml} \leq \text{serum 25-hydroxyvitamin D}_3 \leq 20$   
48  $\text{ng/ml}$ ) without UFs will be randomly assigned in a 1:1 ratio to either the intervention  
49 group A or the control group B. Intervention group A will receive an oral dose of  
50 1600 IU (4 capsules)/day vitamin D<sub>3</sub> for up to 2 years. Control group B will receive 2  
51 years follow-up. Patients with vitamin D insufficiency ( $21 \text{ ng/ml} \leq \text{Serum}$   
52  $25\text{-hydroxyvitamin D}_3 \leq 29 \text{ ng/ml}$ ) without UFs will be randomly assigned in a 1:1  
53 ratio to intervention group C or control group D. Intervention group C will accept an  
54  
55  
56  
57  
58  
59  
60

1  
2  
3  
4 oral dose of 800 IU (2 capsules)/day vitamin D<sub>3</sub> for up to 2 years. Control group D  
5 will receive 2 years follow-up. Gynecologic ultrasound examinations will be  
6 performed every six months. The number, location and size of the UFs will be  
7 documented. The safety of subjects will be evaluated, including blood routine  
8 examination, electrolyte, hepatic and renal function, liver and urinary system  
9 ultrasound, and serum 25-hydroxyvitamin D<sub>3</sub>. Vitamin D receptor genotype of all  
10 patients will also be tested. Vitamin D<sub>3</sub> soft capsules (400 IU per capsule) are  
11 purchased from Sinopharm star shark pharmaceutical (Xiamen, China) co., LTD and  
12 can be preserved for 2 years. An overview of the study design is shown in Figure 1  
13 and Table 2.

### 23 **Sample size**

24  
25 The planned sample size is estimated based on the data from a previous study, in  
26 which the UFs incidence was 1.278% per year in Asia and 3.745% per year in  
27 African-American women. Women over the age of 40 years are more likely to have  
28 UFs.<sup>1</sup> A study also revealed that African-American females had lower level of serum  
29 25-hydroxyvitamin D<sub>3</sub> as compared to Caucasian females.<sup>28</sup> Vitamin D deficiency is  
30 shown to increase the risk of UFs in vitro, in vivo animal models and in a  
31 small-sample clinical trial. We assume a one-tailed  $\alpha$  error of 0.05 and a power (1- $\beta$ )  
32 of 0.8. If the rates are 3.745% for the control group and 1.278% for the intervention  
33 group, we allow for a dropout rate of 10% for an effective sample size of 2108 and  
34 propose to enroll 2320 participants (580 randomized to each arm).

### 44 **Inclusion criteria**

- 45 1. Volunteers to participate in the study with an informed consent;
- 46 2. Married females aged 35-50 who are confirmed with a normal, fibroid-free uterine  
47 structure, by means of transvaginal ultrasonography;
- 48 3. Serum 25-hydroxyvitamin D<sub>3</sub>  $\geq 12$  ng/ml,  $\leq 29$  ng/ml.

### 54 **Exclusion criteria**

- 55 1. Women with Serum 25-hydroxyvitamin D<sub>3</sub>  $< 12$  ng/ml or  $> 29$  ng/ml.
- 56 2. BMI  $< 18.5$  kg/m<sup>2</sup> or BMI  $> 25$  kg/m<sup>2</sup>.
- 57 3. Use of sexual hormone, mifepristone, GnRH $\alpha$ , or other medications which are

likely to interfere with UFs in the past 3 months;

4. Pregnancy, lactation, postmenopause, or planned pregnancy within two years;

5. Allergic to vitamin D<sub>3</sub> soft capsules;

6. Suspected or identified as other tumors of genital tract;

7. History of hysterectomy or myomectomy;

8. History of osteoporosis or vitamin D deficiency taking vitamin D supplements constantly within previous one month;

9. History of hyperparathyroidism, infectious diseases (tuberculosis, Acquired immunodeficiency syndrome), autoimmune diseases, or digestive system diseases (malabsorption, crohn disease and dysentery);

10. Alanine aminotransferase (ALT) or aspartate transaminase (AST) more than 3 times of the normal upper limit, total bilirubin (TBIL) more than 2 times of the normal upper limit;

11. Creatinine levels  $\geq 1.4$  mg/dl (123  $\mu\text{mol/l}$ ) or creatinine clearance  $\leq 50$  ml/min;

12. History of malignant tumors;

13. Simultaneous participation in another clinical study with investigational medicinal product(s).

### **Outcomes measures**

The primary outcome is the first diagnosis of UFs in different groups. The secondary outcomes include hypercalcemia, abnormal liver and renal function, and urinary calculus in different groups. Transvaginal ultrasound examinations will be performed by a well-experienced physician in gynecology. If possible, the same examiner should conduct all examinations of a subject and the same ultrasound machine should be used throughout the study.

### **Withdrawal**

Subjects must be withdrawn from the study when one of the following criteria occurs:

1. At their own request. At any time during the study and without giving reasons, a subject may decline to participate further. The subject will not suffer any disadvantages as a result;

2. In the investigator's opinion, continuation of the study treatment would be harmful to the subject's health;
3. Patients with poor compliance;
4. Lost to follow-up;
5. Pregnancy;
6. Receive other medical treatments which may affect the level of serum 25-hydroxyvitamin D<sub>3</sub> or other surgical treatments;
7. The level of serum calcium >3.5 mmol/L or serum 25-hydroxyvitamin D<sub>3</sub> >150 ng/ml.

### **Safety assessments**

Safety of vitamin D administrated in patients without UFs will be assessed by renal and liver function test, serum electrolyte (sodium, chloride, potassium, calcium, and phosphorus), blood routine test, and serum 25-hydroxyvitamin D<sub>3</sub>. Urine pregnancy test and serum 25-hydroxyvitamin D<sub>3</sub> level will be detected every three months. Other indicators will be detected during the period of screening and after the treatment of every six months. Liver and urinary system ultrasound will be conducted after the treatment of 12 months and 24 months. The occurrence of any adverse events in trial participants will be recorded in the case report forms during each patient visit. Patients will be withdrawn who have severe adverse events, as it is unsafe for them to continue the trial. Meanwhile, we will give them relevant medical care and follow them up until the reaction has terminated.

### **Part II: Association between vitamin D and the development of UFs.**

#### **Study objectives**

The primary objective of this part is to assess the association of supplementation with vitamin D on inhibiting the development of UFs within one year and two years. The secondary objective of part II is to evaluate the safety of supplementation with vitamin D in UFs subjects.

#### **Trial design**

After signing of informed consent, UFs patients with vitamin D deficiency (12 ng/ml  $\leq$  Serum 25-hydroxyvitamin D<sub>3</sub>  $\leq$  20 ng/ml) will be randomly assigned in a 1:1

ratio to intervention group A or control group B. Intervention group A will accept an oral dose of 1600 IU (4 capsules)/day vitamin D<sub>3</sub> for up to 2 years. Control group B will receive 2-year follow-up. UFs patients with vitamin D insufficiency (21 ng/ml ≤ Serum 25-hydroxyvitamin D<sub>3</sub> ≤ 29 ng/ml) will be randomly assigned in a 1:1 ratio to intervention group C or control group D. Intervention group C will accept an oral dose of 800 IU (2 capsules)/day vitamin D<sub>3</sub> for up to 2 years. Control group D will receive 2-year follow-up. Gynecologic ultrasound examinations will be performed every three months. The number, location and size of the UFs will be documented (the transverse, longitudinal, and antero-posterior diameters of fibroids will be documented at each efficacy ultrasound examination for volume calculation). The safety of vitamin D in subjects with UFs will be evaluated, including blood routine examination, serum electrolyte, hepatic and renal function, liver and urinary system ultrasound, and serum 25-hydroxyvitamin D<sub>3</sub>. Vitamin D<sub>3</sub> soft capsules (400 IU per capsule) are purchased from Sinopharm star shark pharmaceutical (Xiamen, China) co., LTD. An overview of the study design is shown in Figure 2 and Table 3.

### Sample size

According to a previous study, the volume of UFs was 8.2 (2.1-30.5) cm<sup>3</sup> after the supplement of vitamin D for 12 months and 11.4 (5.5-22.3) cm<sup>3</sup> in the control group after 12 months follow-up, respectively.<sup>26</sup> On the basis of a 0.9 power to detect a significant difference ( $\alpha=0.05$ , one-sided), 320 participants will be required for the four groups in a 1:1:1:1 ratio. Allowing for a 10% withdrawal rate, we plan to enroll 360 patients in the whole trial (90 randomized to each arm).

### Inclusion criteria

1. Patients are willing to cooperate with the follow-up and sign an informed consent;
2. Married females aged 35-50 who are diagnosed as UFs by transvaginal ultrasonography;
3. The maximum average diameter of intramural myoma is ≤ 4 cm, ≥ 1 cm;
4. Serum 25-hydroxyvitamin D<sub>3</sub> ≥12 ng/ml, ≤29 ng/ml.

### Exclusion criteria

1. Women with Serum 25-hydroxyvitamin D<sub>3</sub> <12 ng/ml or >29 ng/ml.

2. BMI <18.5 kg/m<sup>2</sup> or BMI >25 kg/m<sup>2</sup>.
3. Patients with heavy menstrual bleeding (>80.0 ml) per menstrual period, menstrual disorders, pelvic discomfort, infertility, or other indications for operation;
4. Patients complicated with leiomyoma degeneration and adenomyosis that were suspected or diagnosed by transvaginal ultrasound or gynecologic examination;
5. Allergic to vitamin D<sub>3</sub> soft capsules;
6. Use of sexual hormone, mifepristone, GnRHa, or other medication which is likely to interfere with UFs in the past 3 months;
7. Pregnancy, lactation, postmenopause, or planned pregnancy within two years;
8. Suspected or identified as other tumors of genital tract;
9. History of osteoporosis or vitamin D deficiency taking vitamin D supplements within previous one month;
10. History of autoimmune diseases, infectious diseases (tuberculosis, AIDS), autoimmune diseases, digestive system diseases (malabsorption, crohn disease, and dysentery);
11. ALT or AST more than 3 times of the normal upper limit, TBIL more than 2 times of the normal upper limit;
12. Creatinine levels  $\geq 1.4$  mg/dl (123  $\mu$ mol/l) or creatinine clearance  $\leq 50$  ml/min;
13. History of malignant tumors;
14. Some cases those uteruses are difficult to scan or the amount of UFs is more than 4.
15. Simultaneous participation in another clinical study with investigational medicinal product(s).

### Outcomes measures

Primary outcomes: percent change in volume of the largest fibroid and total fibroids compared to baseline (baseline = last value obtained before randomization; measured by ultrasound examination). The volume of the largest uterine leiomyoma (in cm<sup>3</sup>) was calculated with the following formula:

$$volume = \frac{4\pi}{3} \times \frac{a}{2} \times \frac{b}{2} \times \frac{c}{2} = \frac{\pi \cdot a \cdot b \cdot c}{6}$$



1  
2  
3  
4 Secondary outcomes: percentage of subjects undergoing other medical or  
5 surgical treatment, hypercalcemia, urinary calculus, abnormal liver and renal function.  
6 Transvaginal ultrasound examinations will be performed by a well-experienced  
7 gynecologist. If possible, the same examiner should conduct all examinations for each  
8 subject throughout the study and the same ultrasound machine should be used  
9 throughout the study.  
10  
11  
12  
13  
14

### 15 **Withdrawal**

16  
17 Subjects must be withdrawn from the study when one of the following criteria  
18 occurs:  
19

- 20  
21 1. At their own request. At any time during the study and without giving reasons, a  
22 subject may decline to participate further. The subject will not suffer any  
23 disadvantages as a result;
- 24  
25 2. In the investigator's opinion, continuation of the study treatment would be harmful  
26 to the subject's health;
- 27  
28 3. Patients with poor compliance;
- 29  
30 4. Lost to follow-up;
- 31  
32 5. Pregnancy;
- 33  
34 6. Other medical or surgical treatments for UFs;
- 35  
36 7. Receive other medical treatments which may affect the level of serum  
37 25-hydroxyvitamin D<sub>3</sub> or other surgical treatments;
- 38  
39 8. The level of serum calcium >3.5 mmol/L or serum 25-hydroxyvitamin D<sub>3</sub> >150  
40 ng/ml.  
41  
42  
43  
44  
45

### 46 **Safety assessments**

47  
48 Safety of vitamin D administered in patients with UFs will be assessed by the  
49 same methods as part I.  
50

### 51 **Treatment compliance assessment**

52  
53 All research medications (Vitamin D<sub>3</sub> soft capsules) should be recorded. Standard  
54 with good compliance is defined as:  $80\% \leq \text{Actual oral dose/dose} * 100\% \leq 120\%$ .  
55  
56 Criteria for poor compliance is as follows:  $\text{Actual oral dose/dose} * 100\% \leq 80\%$  or  
57  
58  
59  
60

1  
2  
3  
4 Actual oral dose/dose \* 100%  $\geq$  120%. Each follow-up should be based on the  
5 number of returned study drugs to determine the drug compliance. Subjects should  
6 return all unused research drugs and empty packages of used drugs every follow-up.  
7  
8

### 9 10 **Statistical analysis**

11 Statistical analyses will be performed using SPSS version 22.0 for Windows  
12 (SPSS Inc., Chicago, IL, USA). The randomisation sequence is generated by the use  
13 of the Random Number Table. The normal distribution of continuous variables is  
14 tested by one-sample Kolmogorov-Smirnov test. Continuous variables with normal  
15 distribution are reported as mean (standard deviation); non-normal variables are  
16 presented as median (interquartile range). Means of 2 and 3 or more continuous  
17 normally distributed variables, respectively, are compared by independent samples  
18 Student's t test or one-way ANOVA test. Mann-Whitney U test and  
19 Kruskal-Wallis test are used, respectively, to compare means of 2 and 3 or more  
20 groups of variables that are not normally distributed. The frequencies of categorical  
21 variables are compared using Pearson  $\chi^2$  or Fisher's exact test, when appropriate. A  
22 value of  $P < 0.05$  is considered statistical significance.  
23  
24  
25  
26  
27  
28  
29  
30  
31  
32  
33  
34

### 35 **Ethics and dissemination**

36 The study has been approved by the ethics committee of the Second Affiliated  
37 Hospital of Wenzhou Medical University (No. LCKY2018-35) and registered in the  
38 United States National Institutes of Health Clinical Trials Registry: NCT03586947  
39 and NCT03584529. The procedure will be performed following the principles  
40 described in the declaration of helsinki. We will publish the results of this study in  
41 peer-reviewed journals and related websites.  
42  
43  
44  
45  
46  
47

### 48 **No Patient and Public Involvement**

49 There were no funds or time allocated for patient and public involvement so we  
50 were unable to involve patients. We have invited patients to help us develop our  
51 dissemination strategy.  
52  
53  
54  
55

### 56 **Discussion**

57 There is an increasing awareness that vitamin D deficiency is associated with  
58 many health outcomes. Up to now, the roles of vitamin D in calcium homeostasis and  
59  
60

1  
2  
3  
4 bone health have been well characterized.<sup>29</sup> In the last decade, it has been recognized  
5 that vitamin D also prevented cardiovascular diseases, infections, adverse pregnancy  
6 outcomes and tumors.<sup>30 31</sup> Nevertheless, the cut-off thresholds for vitamin D  
7 deficiency and optimal levels are still controversial. The guideline of The Endocrine  
8 Society suggests vitamin D insufficiency is defined as a serum 25-hydroxyvitamin D<sub>3</sub>  
9 of 21–29 ng/ml, and vitamin D deficiency as a serum 25-hydroxyvitamin D<sub>3</sub> below 20  
10 ng/ml.<sup>32</sup> The guideline also recommends that patients with vitamin D deficiency  
11 should be treated with 50,000 IU of vitamin D once a week for 8 weeks to achieve a  
12 blood level of serum 25-hydroxyvitamin D<sub>3</sub> above 30 ng/ml, followed by maintenance  
13 therapy of 1500–2000 IU/day. Patients with vitamin D insufficiency require at least  
14 600 IU/day of vitamin D for the prevention of vitamin D deficiency.<sup>32</sup> In fact, the  
15 level of serum 25-hydroxyvitamin D<sub>3</sub> varies from race to race. It is reported that  
16 caucasian females have higher serum 25-hydroxyvitamin D<sub>3</sub> concentrations than the  
17 others.<sup>33 34</sup> According to the guideline of Institute of Medicine, however, vitamin D  
18 deficiency is defined as a serum 25-hydroxyvitamin D<sub>3</sub> below 12 ng/ml, and vitamin  
19 D insufficiency as a serum 25-hydroxyvitamin D<sub>3</sub> of 12-20 ng/ml.<sup>35</sup> Specialists from  
20 Osteoporosis Committee of China Gerontological Society recommend that patients  
21 with high risks (history of osteoporosis, inadequate sun exposure, use of  
22 glucocorticoid, etc.) whose blood levels of serum 25-hydroxyvitamin D<sub>3</sub> are between  
23 12 and 20 ng/ml should receive at least 600 IU/day vitamin D supplementation.<sup>36</sup>  
24 Patients with blood levels of serum 25-hydroxyvitamin D<sub>3</sub> exceed 20 ng/ml could  
25 obtain an adequate amount of vitamin D from dietary sources and sun exposure.<sup>36</sup> It is  
26 reported that the single-nucleotide polymorphisms in vitamin D receptor genes  
27 modified the efficacy of vitamin D<sub>3</sub> supplementation to increase circulating serum  
28 25-hydroxyvitamin D<sub>3</sub> levels.<sup>37</sup> To determine the potential relationship between them,  
29 the vitamin D receptor genotype of all patients will be tested. Females over the age of  
30 35 years are more likely to suffer from UFs. Furthermore, post menopause and  
31 pregnancy might affect the development and progression of UFs.<sup>1</sup> So the females  
32 aged 35-50 years are chosen in this trial. We will exclude patients who are pregnant,  
33 lactant, postmenopausal, or planned pregnancy within two years. In this study,  
34  
35  
36  
37  
38  
39  
40  
41  
42  
43  
44  
45  
46  
47  
48  
49  
50  
51  
52  
53  
54  
55  
56  
57  
58  
59  
60

1  
2  
3 patients with vitamin D deficiency or insufficiency will receive adequate vitamin D  
4 supplementation. Dietary vitamin D intake and other supplements of vitamin D will  
5 be limited.  
6  
7  
8

9 In conclusion, this is the first study protocol of an open-label, randomised  
10 controlled trial to evaluate the efficacy and safety of vitamin D supplementation in  
11 preventing and inhibiting the UFs. However, our study should be interpreted within  
12 the context of two limitations. First, the trial is not a double-blind, placebo-controlled  
13 trial. Furthermore, another limitation is that the trial is implemented in only one  
14 hospital. Notwithstanding these limitations, the results from this study will provide  
15 new evidences about vitamin D preparations in UFs from a well-designed trial. Once  
16 our hypothesis is confirmed, this study will provide a more effective, safe, and  
17 low-cost therapy in the prevention and treatment of UFs.  
18  
19  
20  
21  
22  
23  
24  
25  
26  
27  
28

### 29 **Author Contributions**

30 X.Q.Z. is the principal investigator of this study and refined the protocol. B.S.  
31 and Y.Z.S. wrote the manuscript and contributed to the design of the study. B.S. will  
32 recruit the patients and conduct the trial. Y.Z.S., X.Q.Z. and Y.L. will supervise the  
33 trial. C.C.J., the medical statistician for the study, will contribute to the statistical  
34 design and analysis of data. All authors have revised the protocol critically for  
35 important intellectual content and approved the final manuscript.  
36  
37  
38  
39  
40  
41  
42  
43  
44

### 45 **Funding statement**

46 This work was supported by the clinical trial center of the Second Affiliated  
47 Hospital of Wenzhou Medical University (No: SAHoWMU-CR2017-07-101) and  
48 grants from Wenzhou Science and Technology Grant (Y20170604). Sponsors of the  
49 study had no involvement in the collection, analysis, and interpretation of data or the  
50 writing of the manuscript.  
51  
52  
53  
54  
55  
56  
57

### 58 **Competing interests statement**

59 All authors declare that they have no conflict of interest.  
60

**Word Count:** 3900

## References

1. Stewart EA, Cookson CL, Gandolfo RA, et al. Epidemiology of uterine fibroids: a systematic review. *BJOG* 2017;124(10):1501-12. doi: 10.1111/1471-0528.14640 [published Online First: 2017/03/16]
2. Dagur G, Suh Y, Warren K, et al. Urological complications of uterine leiomyoma: a review of literature. *Int Urol Nephrol* 2016;48(6):941-8. doi: 10.1007/s11255-016-1248-5 [published Online First: 2016/02/29]
3. Vilos GA, Allaire C, Laberge PY, et al. The management of uterine leiomyomas. *J Obstet Gynaecol Can* 2015;37(2):157-78. doi: 10.1016/S1701-2163(15)30338-8 [published Online First: 2015/03/15]
4. Donnez J, Dolmans MM. Uterine fibroid management: from the present to the future. *Hum Reprod Update* 2016;22(6):665-86. doi: 10.1093/humupd/dmw023 [published Online First: 2016/07/29]
5. Malik M, Britten J, Cox J, et al. Gonadotropin-releasing hormone analogues inhibit leiomyoma extracellular matrix despite presence of gonadal hormones. *Fertil Steril* 2016;105(1):214-24. doi: 10.1016/j.fertnstert.2015.09.006 [published Online First: 2015/09/28]
6. Ali M, Chaudhry ZT, Al-Hendy A. Successes and failures of uterine leiomyoma drug discovery. *Expert Opin Drug Discov* 2018;13(2):169-77. doi: 10.1080/17460441.2018.1417381 [published Online First: 2017/12/20]
7. Shen Q, Hua Y, Jiang W, et al. Effects of mifepristone on uterine leiomyoma in premenopausal women: a meta-analysis. *Fertil Steril* 2013;100(6):1722-6 e1-10. doi: 10.1016/j.fertnstert.2013.08.039 [published Online First: 2013/10/08]
8. Liu C, Lu Q, Qu H, et al. Different dosages of mifepristone versus enantone to treat uterine fibroids: A multicenter randomized controlled trial. *Medicine (Baltimore)* 2017;96(7):e6124. doi: 10.1097/MD.00000000000006124

[published Online First: 2017/02/17]

9. Shen Q, Shu L, Luo H, et al. The use of mifepristone in abortion associated with an increased risk of uterine leiomyomas. *Medicine (Baltimore)* 2017;96(17):e6680. doi: 10.1097/MD.0000000000006680 [published Online First: 2017/04/27]
10. Commandeur AE, Styer AK, Teixeira JM. Epidemiological and genetic clues for molecular mechanisms involved in uterine leiomyoma development and growth. *Hum Reprod Update* 2015;21(5):593-615. doi: 10.1093/humupd/dmv030 [published Online First: 2015/07/05]
11. Chen W, Ohara N, Wang J, et al. A novel selective progesterone receptor modulator asoprisnil (J867) inhibits proliferation and induces apoptosis in cultured human uterine leiomyoma cells in the absence of comparable effects on myometrial cells. *J Clin Endocrinol Metab* 2006;91(4):1296-304. doi: 10.1210/jc.2005-2379 [published Online First: 2006/02/09]
12. Murphy AA, Kettel LM, Morales AJ, et al. Regression of uterine leiomyomata in response to the antiprogestosterone RU 486. *J Clin Endocrinol Metab* 1993;76(2):513-7. doi: 10.1210/jcem.76.2.8432797 [published Online First: 1993/02/01]
13. Murji A, Whitaker L, Chow TL, et al. Selective progesterone receptor modulators (SPRMs) for uterine fibroids. *Cochrane Database Syst Rev* 2017;4:CD010770. doi: 10.1002/14651858.CD010770.pub2 [published Online First: 2017/04/27]
14. Melis GB, Neri M, Piras B, et al. Vilaprisan for treating uterine fibroids. *Expert Opin Investig Drugs* 2018;27(5):497-505. doi: 10.1080/13543784.2018.1471134 [published Online First: 2018/05/03]
15. Parazzini F, Di Martino M, Candiani M, et al. Dietary components and uterine leiomyomas: a review of published data. *Nutr Cancer* 2015;67(4):569-79. doi: 10.1080/01635581.2015.1015746 [published Online First: 2015/04/01]
16. Ciebiera M, Lukaszuk K, Meczekalski B, et al. Alternative Oral Agents in Prophylaxis and Therapy of Uterine Fibroids-An Up-to-Date Review. *Int J Mol Sci* 2017;18(12) doi: 10.3390/ijms18122586 [published Online First:

- 2017/12/02]
17. Baird DD, Hill MC, Schectman JM, et al. Vitamin d and the risk of uterine fibroids. *Epidemiology* 2013;24(3):447-53. doi: 10.1097/EDE.0b013e31828acca0 [published Online First: 2013/03/16]
  18. Ciebiera M, Wlodarczyk M, Slabuszewska-Jozwiak A, et al. Influence of vitamin D and transforming growth factor beta3 serum concentrations, obesity, and family history on the risk for uterine fibroids. *Fertil Steril* 2016;106(7):1787-92. doi: 10.1016/j.fertnstert.2016.09.007 [published Online First: 2016/10/17]
  19. Blauer M, Rovio PH, Ylikomi T, et al. Vitamin D inhibits myometrial and leiomyoma cell proliferation in vitro. *Fertil Steril* 2009;91(5):1919-25. doi: 10.1016/j.fertnstert.2008.02.136 [published Online First: 2008/04/22]
  20. Halder SK, Goodwin JS, Al-Hendy A. 1,25-Dihydroxyvitamin D3 reduces TGF-beta3-induced fibrosis-related gene expression in human uterine leiomyoma cells. *J Clin Endocrinol Metab* 2011;96(4):E754-62. doi: 10.1210/jc.2010-2131 [published Online First: 2011/02/04]
  21. Halder SK, Sharan C, Al-Hendy A. 1,25-dihydroxyvitamin D3 treatment shrinks uterine leiomyoma tumors in the Eker rat model. *Biol Reprod* 2012;86(4):116. doi: 10.1095/biolreprod.111.098145 [published Online First: 2012/02/04]
  22. Halder SK, Sharan C, Al-Hendy O, et al. Paricalcitol, a vitamin d receptor activator, inhibits tumor formation in a murine model of uterine fibroids. *Reprod Sci* 2014;21(9):1108-19. doi: 10.1177/1933719114537721 [published Online First: 2014/06/14]
  23. Corachan A, Ferrero H, Aguilar A, et al. Inhibition of tumor cell proliferation in human uterine leiomyomas by vitamin D via Wnt/beta-catenin pathway. *Fertil Steril* 2019;111(2):397-407. doi: 10.1016/j.fertnstert.2018.10.008 [published Online First: 2018/11/22]
  24. Corachan A, Ferrero H, Escrig J, et al. Long-term vitamin D treatment decreases human uterine leiomyoma size in a xenograft animal model. *Fertil Steril* 2020;113(1):205-16 e4. doi: 10.1016/j.fertnstert.2019.09.018 [published

- 1  
2  
3  
4 Online First: 2019/11/20]
- 5  
6 25. Li S, Chen B, Sheng B, et al. The associations between serum vitamin D, calcium  
7 and uterine fibroids in Chinese women: a case-controlled study. *J Int Med Res*  
8 2020;48(5):300060520923492. doi: 10.1177/0300060520923492 [published  
9  
10 Online First: 2020/05/28]
- 11  
12  
13 26. Ciavattini A, Delli Carpini G, Serri M, et al. Hypovitaminosis D and "small  
14 burden" uterine fibroids: Opportunity for a vitamin D supplementation.  
15 *Medicine (Baltimore)* 2016;95(52):e5698. doi:  
16 10.1097/MD.0000000000005698 [published Online First: 2016/12/30]
- 17  
18 27. Arjeh S, Darsareh F, Asl ZA, et al. Effect of oral consumption of vitamin D on  
19 uterine fibroids: A randomized clinical trial. *Complement Ther Clin Pract*  
20 2020;39:101159. doi: 10.1016/j.ctcp.2020.101159 [published Online First:  
21 2020/05/08]
- 22  
23 28. Brakta S, Diamond JS, Al-Hendy A, et al. Role of vitamin D in uterine fibroid  
24 biology. *Fertil Steril* 2015;104(3):698-706. doi:  
25 10.1016/j.fertnstert.2015.05.031 [published Online First: 2015/06/17]
- 26  
27 29. Fleet JC. The role of vitamin D in the endocrinology controlling calcium  
28 homeostasis. *Mol Cell Endocrinol* 2017;453:36-45. doi:  
29 10.1016/j.mce.2017.04.008 [published Online First: 2017/04/13]
- 30  
31 30. Faridi KF, Lupton JR, Martin SS, et al. Vitamin D deficiency and non-lipid  
32 biomarkers of cardiovascular risk. *Arch Med Sci* 2017;13(4):732-37. doi:  
33 10.5114/aoms.2017.68237 [published Online First: 2017/07/20]
- 34  
35 31. Akoh CC, Pressman EK, Cooper E, et al. Low Vitamin D is Associated With  
36 Infections and Proinflammatory Cytokines During Pregnancy. *Reprod Sci*  
37 2018;25(3):414-23. doi: 10.1177/1933719117715124 [published Online First:  
38 2017/06/18]
- 39  
40 32. Holick MF, Binkley NC, Bischoff-Ferrari HA, et al. Evaluation, treatment, and  
41 prevention of vitamin D deficiency: an Endocrine Society clinical practice  
42 guideline. *J Clin Endocrinol Metab* 2011;96(7):1911-30. doi:  
43 10.1210/jc.2011-0385 [published Online First: 2011/06/08]
- 44  
45  
46  
47  
48  
49  
50  
51  
52  
53  
54  
55  
56  
57  
58  
59  
60



- 1  
2  
3  
4 33. Alzaman NS, Dawson-Hughes B, Nelson J, et al. Vitamin D status of black and  
5 white Americans and changes in vitamin D metabolites after varied doses of  
6 vitamin D supplementation. *Am J Clin Nutr* 2016;104(1):205-14. doi:  
7 10.3945/ajcn.115.129478 [published Online First: 2016/05/20]  
8  
9  
10  
11 34. Powe CE, Evans MK, Wenger J, et al. Vitamin D-binding protein and vitamin D  
12 status of black Americans and white Americans. *N Engl J Med*  
13 2013;369(21):1991-2000. doi: 10.1056/NEJMoa1306357 [published Online  
14 First: 2013/11/22]  
15  
16  
17  
18 35. Aspray TJ, Bowring C, Fraser W, et al. National Osteoporosis Society vitamin D  
19 guideline summary. *Age Ageing* 2014;43(5):592-5. doi:  
20 10.1093/ageing/afu093 [published Online First: 2014/07/31]  
21  
22  
23  
24 36. Liao X, Zhang Z, Zhang H, et al. Application Guideline for Vitamin D and Bone  
25 Health in Adult Chinese (2014 Standard Edition). *Chinese Journal of*  
26 *Osteoporosis* 2014;20(09):1011-30.  
27  
28  
29  
30 37. Barry EL, Rees JR, Peacock JL, et al. Genetic variants in CYP2R1, CYP24A1,  
31 and VDR modify the efficacy of vitamin D3 supplementation for increasing  
32 serum 25-hydroxyvitamin D levels in a randomized controlled trial. *J Clin*  
33 *Endocrinol Metab* 2014;99(10):E2133-7. doi: 10.1210/jc.2014-1389  
34 [published Online First: 2014/07/30]  
35  
36  
37  
38 38. de Boer IH, Zelnick LR, Ruzinski J, et al. Effect of Vitamin D and Omega-3 Fatty  
39 Acid Supplementation on Kidney Function in Patients With Type 2 Diabetes:  
40 A Randomized Clinical Trial. *JAMA* 2019 doi: 10.1001/jama.2019.17380  
41 [published Online First: 2019/11/09]  
42  
43  
44  
45 39. Burt LA, Billington EO, Rose MS, et al. Effect of High-Dose Vitamin D  
46 Supplementation on Volumetric Bone Density and Bone Strength: A  
47 Randomized Clinical Trial. *JAMA* 2019;322(8):736-45. doi:  
48 10.1001/jama.2019.11889 [published Online First: 2019/08/28]  
49  
50  
51  
52 40. Urashima M, Ohdaira H, Akutsu T, et al. Effect of Vitamin D Supplementation on  
53 Relapse-Free Survival Among Patients With Digestive Tract Cancers: The  
54 AMATERASU Randomized Clinical Trial. *JAMA* 2019;321(14):1361-69. doi:  
55  
56  
57  
58  
59  
60

- 1  
2  
3  
4 10.1001/jama.2019.2210 [published Online First: 2019/04/10]  
5  
6 41. Scragg R, Khaw KT, Toop L, et al. Monthly High-Dose Vitamin D  
7  
8     Supplementation and Cancer Risk: A Post Hoc Analysis of the Vitamin D  
9  
10     Assessment Randomized Clinical Trial. *JAMA Oncol* 2018;4(11):e182178.  
11     doi: 10.1001/jamaoncol.2018.2178 [published Online First: 2018/07/22]  
12  
13 42. Aglipay M, Birken CS, Parkin PC, et al. Effect of High-Dose vs Standard-Dose  
14  
15     Wintertime Vitamin D Supplementation on Viral Upper Respiratory Tract  
16  
17     Infections in Young Healthy Children. *JAMA* 2017;318(3):245-54. doi:  
18     10.1001/jama.2017.8708 [published Online First: 2017/07/19]  
19  
20 43. Zittermann A, Ernst JB, Prokop S, et al. Effect of vitamin D on all-cause mortality  
21  
22     in heart failure (EVITA): a 3-year randomized clinical trial with 4000 IU  
23  
24     vitamin D daily. *Eur Heart J* 2017;38(29):2279-86. doi:  
25     10.1093/eurheartj/ehx235 [published Online First: 2017/05/13]  
26  
27 44. Lappe J, Watson P, Travers-Gustafson D, et al. Effect of Vitamin D and Calcium  
28  
29     Supplementation on Cancer Incidence in Older Women: A Randomized  
30  
31     Clinical Trial. *JAMA* 2017;317(12):1234-43. doi: 10.1001/jama.2017.2115  
32     [published Online First: 2017/03/30]  
33  
34 45. Arora P, Song Y, Dusek J, et al. Vitamin D therapy in individuals with  
35  
36     prehypertension or hypertension: the DAYLIGHT trial. *Circulation*  
37  
38     2015;131(3):254-62. doi: 10.1161/CIRCULATIONAHA.114.011732  
39     [published Online First: 2014/11/02]  
40  
41 46. Rusinska A, Pludowski P, Walczak M, et al. Vitamin D Supplementation  
42  
43     Guidelines for General Population and Groups at Risk of Vitamin D  
44  
45     Deficiency in Poland-Recommendations of the Polish Society of Pediatric  
46  
47     Endocrinology and Diabetes and the Expert Panel With Participation of  
48  
49     National Specialist Consultants and Representatives of Scientific  
50  
51     Societies-2018 Update. *Front Endocrinol (Lausanne)* 2018;9:246. doi:  
52     10.3389/fendo.2018.00246 [published Online First: 2018/06/16]  
53  
54  
55  
56  
57  
58  
59  
60

1  
2  
3  
4  
5  
6  
7  
8  
9  
10  
11  
12  
13  
14  
15  
16  
17  
18  
19  
20  
21  
22  
23  
24  
25  
26  
27  
28  
29  
30  
31  
32  
33  
34  
35  
36  
37  
38  
39  
40  
41  
42  
43  
44  
45  
46  
47  
48  
49  
50  
51  
52  
53  
54  
55  
56  
57  
58  
59  
60

For peer review only

1  
2  
3  
4 **Figure legends**  
5  
6

7 Figure 1: Flow chart showing the steps of part I in participant recruitment, treatment  
8 and analysis.  
9  
10

11  
12 Figure 2: Flow chart showing the steps of part II in participant recruitment, treatment  
13 and analysis.  
14  
15  
16  
17  
18  
19  
20  
21  
22  
23  
24  
25  
26  
27  
28  
29  
30  
31  
32  
33  
34  
35  
36  
37  
38  
39  
40  
41  
42  
43  
44  
45  
46  
47  
48  
49  
50  
51  
52  
53  
54  
55  
56  
57  
58  
59  
60

For peer review only

**Table 1: The doses of vitamin D supplementation in different clinical trials published since 2010.**

| Group             | Country     | Population                                    | Age (years)                                 | Oral vitamin D                                                                                                                                        | Reference     |
|-------------------|-------------|-----------------------------------------------|---------------------------------------------|-------------------------------------------------------------------------------------------------------------------------------------------------------|---------------|
| Endocrine Society | USA         | General population                            | >19                                         | Risk of vitamin D deficiency: 1500-2000 IU/day;<br>Vitamin D deficiency: 50,000 IU/wk for 8 wk followed by maintenance therapy of 1500-2000 IU/day    | <sup>32</sup> |
| Boer et al.       | USA         | Participants with type 2 diabetes             | Men aged $\geq 50$ and women aged $\geq 55$ | Vitamin D <sub>3</sub> (cholecalciferol 2000 IU/day) and matching inert placebo                                                                       | <sup>38</sup> |
| Burt et al.       | Canada      | Healthy adults without osteoporosis           | 55-70                                       | Vitamin D <sub>3</sub> at 400 IU/day (n=109), or 4000 IU/day (n=100), or 10,000 IU/day (n=102) for 3 years                                            | <sup>39</sup> |
| Urashima et al.   | Japan       | Patients with digestive tract cancers overall | 30-90                                       | Vitamin D 2000 IU/day and matching placebo                                                                                                            | <sup>40</sup> |
| Scragg et al.     | New Zealand | General population                            | 50-84                                       | Vitamin D at initial bolus dose of 200,000 IU, followed by maintenance dose of 100,000 IU/month                                                       | <sup>41</sup> |
| Aglipay et al.    | Canada      | Children                                      | 1-5                                         | Vitamin D at doses of 2000 IU/day (n=349) and 400 IU/day (n=354)                                                                                      | <sup>42</sup> |
| Zittermann et al. | Germany     | Heart failure patients                        | 18-79                                       | Patient with serum 25-hydroxyvitamin D <sub>3</sub> level <75 nmol/l were randomized to receive 4000 IU/day vitamin D or matching placebo for 3 years | <sup>43</sup> |
| Lappe et al.      | USA         | Postmenopausal women                          | $\geq 55$                                   | Treatment group: 2000 IU/d vitamin D <sub>3</sub> and                                                                                                 | <sup>44</sup> |

|                    |        |                                                                                                                 |       |                                                                                             |               |
|--------------------|--------|-----------------------------------------------------------------------------------------------------------------|-------|---------------------------------------------------------------------------------------------|---------------|
|                    |        |                                                                                                                 |       | 1500 mg/d calcium;<br>The placebo group:<br>identical placebos                              |               |
| Arora et al.       | USA    | Low vitamin D status<br>(25-hydroxyvitamin D<br>levels $\leq 25$ ng/mL)<br>patients with SBP of<br>120-159 mmHg | 18-50 | High-dose group: 4000<br>IU/day for 6 months;<br>Low-dose group: 400<br>IU/day for 6 months | <sup>45</sup> |
| Rusinska<br>et al. | Poland | Healthy adults                                                                                                  | 19-65 | 800-2000 IU/day                                                                             | <sup>46</sup> |

Abbreviations: SBP, systolic blood pressure.

For peer review only

**Table 2: Flow chart of the study showing timing collection of different variables.**

| Follow-up (times)                      | 1 | 2 | 3 | 4 | 5  | 6  | 7  | 8  | 9  |
|----------------------------------------|---|---|---|---|----|----|----|----|----|
| Time points (Months)                   | 0 | 3 | 6 | 9 | 12 | 15 | 18 | 21 | 24 |
| Informed consent                       | X |   |   |   |    |    |    |    |    |
| Medical history                        | X |   |   |   |    |    |    |    |    |
| Physical examination                   | X | X | X | X | X  | X  | X  | X  | X  |
| Serum 25-hydroxyvitamin D <sub>3</sub> | X | X | X | X | X  | X  | X  | X  | X  |
| Urine pregnancy test                   | X | X | X | X | X  | X  | X  | X  | X  |
| Gynecologic ultrasound                 | X |   | X |   | X  |    | X  |    | X  |
| Hepatic and renal function             | X |   | X |   | X  |    | X  |    | X  |
| Electrolyte                            | X |   | X |   | X  |    | X  |    | X  |
| Blood routine examination              | X |   | X |   | X  |    | X  |    | X  |
| Liver and urinary<br>System ultrasound | X |   |   |   | X  |    |    |    | X  |
| Side-effect assessment                 |   | X | X | X | X  | X  | X  | X  | X  |
| Changes in menstruation                |   | X | X | X | X  | X  | X  | X  | X  |
| Adverse event assessment               |   | X | X | X | X  | X  | X  | X  | X  |
| Vitamin D receptor genotype            | X |   |   |   |    |    |    |    |    |

**Table 3: Flow chart of the study showing timing collection of different variables.**

| Follow-up                              | 1 | 2 | 3 | 4 | 5  | 6  | 7  | 8  | 9  |
|----------------------------------------|---|---|---|---|----|----|----|----|----|
| Months                                 | 0 | 3 | 6 | 9 | 12 | 15 | 18 | 21 | 24 |
| Informed consent                       | X |   |   |   |    |    |    |    |    |
| Medical history                        | X |   |   |   |    |    |    |    |    |
| Physical examination                   | X | X | X | X | X  | X  | X  | X  | X  |
| Serum 25-hydroxyvitamin D <sub>3</sub> | X | X | X | X | X  | X  | X  | X  | X  |
| Urine pregnancy test                   | X | X | X | X | X  | X  | X  | X  | X  |
| Gynecologic ultrasound                 | X | X | X | X | X  | X  | X  | X  | X  |
| Hepatic and renal function             | X |   | X |   | X  |    | X  |    | X  |
| Electrolyte                            | X |   | X |   | X  |    | X  |    | X  |
| Blood routine examination              | X |   | X |   | X  |    | X  |    | X  |
| Liver and urinary                      | X |   |   |   | X  |    |    |    | X  |
| System ultrasound                      |   |   |   |   |    |    |    |    |    |
| Side-effect assessment                 |   | X | X | X | X  | X  | X  | X  | X  |
| Changes in menstruation                |   | X | X | X | X  | X  | X  | X  | X  |
| Adverse event assessment               |   | X | X | X | X  | X  | X  | X  | X  |
| Vitamin D receptor genotype            | X |   |   |   |    |    |    |    |    |



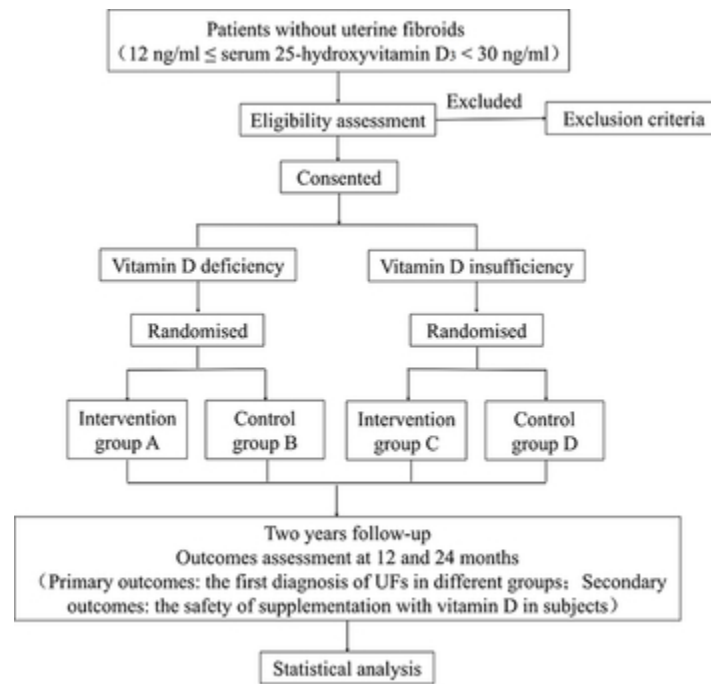

Figure 1: Flow chart showing the steps of part I in participant recruitment, treatment and analysis.

29x28mm (300 x 300 DPI)

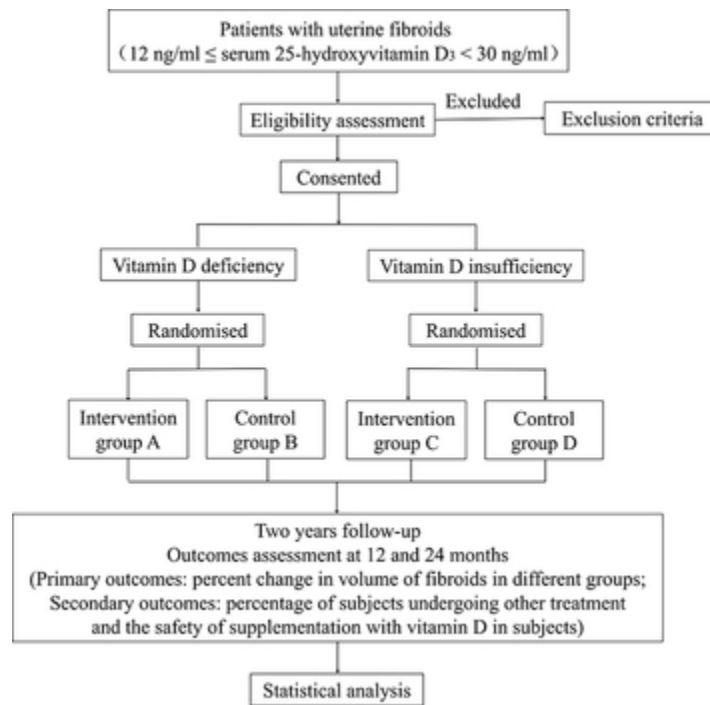

Figure 2: Flow chart showing the steps of part II in participant recruitment, treatment and analysis.

29x29mm (300 x 300 DPI)

# Reporting checklist for protocol of a clinical trial.

Based on the SPIRIT guidelines.

## Instructions to authors

Complete this checklist by entering the page numbers from your manuscript where readers will find each of the items listed below.

Your article may not currently address all the items on the checklist. Please modify your text to include the missing information. If you are certain that an item does not apply, please write "n/a" and provide a short explanation.

Upload your completed checklist as an extra file when you submit to a journal.

In your methods section, say that you used the SPIRIT reporting guidelines, and cite them as:

Chan A-W, Tetzlaff JM, Altman DG, Laupacis A, Gøtzsche PC, Krleža-Jerić K, Hróbjartsson A, Mann H, Dickersin K, Berlin J, Doré C, Parulekar W, Summerskill W, Groves T, Schulz K, Sox H, Rockhold FW, Rennie D, Moher D. SPIRIT 2013 Statement: Defining standard protocol items for clinical trials. *Ann Intern Med.* 2013;158(3):200-207

|                                   |                                                                                                                                 | Page   |
|-----------------------------------|---------------------------------------------------------------------------------------------------------------------------------|--------|
|                                   | Reporting Item                                                                                                                  | Number |
| <b>Administrative information</b> |                                                                                                                                 |        |
| Title                             | <a href="#">#1</a> Descriptive title identifying the study design, population, interventions, and, if applicable, trial acronym | 1      |

|    |                          |                     |                                                              |     |
|----|--------------------------|---------------------|--------------------------------------------------------------|-----|
| 1  | Trial registration       | <a href="#">#2a</a> | Trial identifier and registry name. If not yet registered,   | 2   |
| 2  |                          |                     |                                                              |     |
| 3  |                          |                     | name of intended registry                                    |     |
| 4  |                          |                     |                                                              |     |
| 5  |                          |                     |                                                              |     |
| 6  | Trial registration: data | <a href="#">#2b</a> | All items from the World Health Organization Trial           | n/a |
| 7  | set                      |                     | Registration Data Set                                        |     |
| 8  |                          |                     |                                                              |     |
| 9  |                          |                     |                                                              |     |
| 10 |                          |                     |                                                              |     |
| 11 | Protocol version         | <a href="#">#3</a>  | Date and version identifier                                  | n/a |
| 12 |                          |                     |                                                              |     |
| 13 |                          |                     |                                                              |     |
| 14 |                          |                     |                                                              |     |
| 15 | Funding                  | <a href="#">#4</a>  | Sources and types of financial, material, and other support  | 14  |
| 16 |                          |                     |                                                              |     |
| 17 |                          |                     |                                                              |     |
| 18 | Roles and                | <a href="#">#5a</a> | Names, affiliations, and roles of protocol contributors      | 1   |
| 19 | responsibilities:        |                     |                                                              |     |
| 20 |                          |                     |                                                              |     |
| 21 | contributorship          |                     |                                                              |     |
| 22 |                          |                     |                                                              |     |
| 23 |                          |                     |                                                              |     |
| 24 |                          |                     |                                                              |     |
| 25 |                          |                     |                                                              |     |
| 26 | Roles and                | <a href="#">#5b</a> | Name and contact information for the trial sponsor           | 14  |
| 27 | responsibilities:        |                     |                                                              |     |
| 28 |                          |                     |                                                              |     |
| 29 | sponsor contact          |                     |                                                              |     |
| 30 |                          |                     |                                                              |     |
| 31 | information              |                     |                                                              |     |
| 32 |                          |                     |                                                              |     |
| 33 |                          |                     |                                                              |     |
| 34 |                          |                     |                                                              |     |
| 35 |                          |                     |                                                              |     |
| 36 | Roles and                | <a href="#">#5c</a> | Role of study sponsor and funders, if any, in study design;  | 14  |
| 37 | responsibilities:        |                     | collection, management, analysis, and interpretation of      |     |
| 38 |                          |                     | data; writing of the report; and the decision to submit the  |     |
| 39 | sponsor and funder       |                     | report for publication, including whether they will have     |     |
| 40 |                          |                     | ultimate authority over any of these activities              |     |
| 41 |                          |                     |                                                              |     |
| 42 |                          |                     |                                                              |     |
| 43 |                          |                     |                                                              |     |
| 44 |                          |                     |                                                              |     |
| 45 |                          |                     |                                                              |     |
| 46 |                          |                     |                                                              |     |
| 47 |                          |                     |                                                              |     |
| 48 | Roles and                | <a href="#">#5d</a> | Composition, roles, and responsibilities of the coordinating | n/a |
| 49 | responsibilities:        |                     | centre, steering committee, endpoint adjudication            |     |
| 50 |                          |                     | committee, data management team, and other individuals       |     |
| 51 | committees               |                     | or groups overseeing the trial, if applicable (see Item 21a  |     |
| 52 |                          |                     | for data monitoring committee)                               |     |
| 53 |                          |                     |                                                              |     |
| 54 |                          |                     |                                                              |     |
| 55 |                          |                     |                                                              |     |
| 56 |                          |                     |                                                              |     |
| 57 |                          |                     |                                                              |     |
| 58 |                          |                     |                                                              |     |
| 59 |                          |                     |                                                              |     |
| 60 |                          |                     |                                                              |     |

1 **Introduction**

2

3

4 **Background and** [#6a](#) Description of research question and justification for 4

5

6 rationale

7 undertaking the trial, including summary of relevant studies

8 (published and unpublished) examining benefits and harms

9 for each intervention

10

11

12

13

14 **Background and** [#6b](#) Explanation for choice of comparators 5

15

16 rationale: choice of

17 comparators

18

19

20

21

22 **Objectives** [#7](#) Specific objectives or hypotheses 5

23

24

25 **Trial design** [#8](#) Description of trial design including type of trial (eg, parallel 5

26

27 group, crossover, factorial, single group), allocation ratio,

28 and framework (eg, superiority, equivalence, non-inferiority,

29 exploratory)

30

31

32

33

34

35 **Methods:**

36

37 **Participants,**

38

39 **interventions, and**

40

41 **outcomes**

42

43

44

45 **Study setting** [#9](#) Description of study settings (eg, community clinic, 5

46

47 academic hospital) and list of countries where data will be

48 collected. Reference to where list of study sites can be

49 obtained

50

51

52

53

54 **Eligibility criteria** [#10](#) Inclusion and exclusion criteria for participants. If 6, 7, 9,

55

56 applicable, eligibility criteria for study centres and 10

57

58

59

60

1 individuals who will perform the interventions (eg,  
 2 surgeons, psychotherapists)  
 3

|    |                      |                      |                                                              |
|----|----------------------|----------------------|--------------------------------------------------------------|
| 4  |                      |                      |                                                              |
| 5  |                      |                      |                                                              |
| 6  | Interventions:       | <a href="#">#11a</a> | Interventions for each group with sufficient detail to allow |
| 7  |                      |                      |                                                              |
| 8  | description          |                      | replication, including how and when they will be             |
| 9  |                      |                      |                                                              |
| 10 |                      |                      | administered                                                 |
| 11 |                      |                      |                                                              |
| 12 |                      |                      |                                                              |
| 13 | Interventions:       | <a href="#">#11b</a> | Criteria for discontinuing or modifying allocated            |
| 14 |                      |                      |                                                              |
| 15 | modifications        |                      | interventions for a given trial participant (eg, drug dose   |
| 16 |                      |                      | change in response to harms, participant request, or         |
| 17 |                      |                      | improving / worsening disease)                               |
| 18 |                      |                      |                                                              |
| 19 |                      |                      |                                                              |
| 20 |                      |                      |                                                              |
| 21 |                      |                      |                                                              |
| 22 |                      |                      |                                                              |
| 23 | Interventions:       | <a href="#">#11c</a> | Strategies to improve adherence to intervention protocols,   |
| 24 |                      |                      |                                                              |
| 25 | adherence            |                      | and any procedures for monitoring adherence (eg, drug        |
| 26 |                      |                      | tablet return; laboratory tests)                             |
| 27 |                      |                      |                                                              |
| 28 |                      |                      |                                                              |
| 29 |                      |                      |                                                              |
| 30 |                      |                      |                                                              |
| 31 | Interventions:       | <a href="#">#11d</a> | Relevant concomitant care and interventions that are         |
| 32 |                      |                      |                                                              |
| 33 | concomitant care     |                      | permitted or prohibited during the trial                     |
| 34 |                      |                      |                                                              |
| 35 |                      |                      |                                                              |
| 36 | Outcomes             | <a href="#">#12</a>  | Primary, secondary, and other outcomes, including the        |
| 37 |                      |                      |                                                              |
| 38 |                      |                      | specific measurement variable (eg, systolic blood            |
| 39 |                      |                      | pressure), analysis metric (eg, change from baseline, final  |
| 40 |                      |                      | value, time to event), method of aggregation (eg, median,    |
| 41 |                      |                      | proportion), and time point for each outcome. Explanation    |
| 42 |                      |                      | of the clinical relevance of chosen efficacy and harm        |
| 43 |                      |                      | outcomes is strongly recommended                             |
| 44 |                      |                      |                                                              |
| 45 |                      |                      |                                                              |
| 46 |                      |                      |                                                              |
| 47 |                      |                      |                                                              |
| 48 |                      |                      |                                                              |
| 49 |                      |                      |                                                              |
| 50 |                      |                      |                                                              |
| 51 |                      |                      |                                                              |
| 52 |                      |                      |                                                              |
| 53 | Participant timeline | <a href="#">#13</a>  | Time schedule of enrolment, interventions (including any     |
| 54 |                      |                      |                                                              |
| 55 |                      |                      | run-ins and washouts), assessments, and visits for           |
| 56 |                      |                      |                                                              |
| 57 |                      |                      | participants. A schematic diagram is highly recommended      |
| 58 |                      |                      |                                                              |
| 59 |                      |                      |                                                              |
| 60 |                      |                      |                                                              |

(see Figure)

|    |                              |                      |                                                                 |
|----|------------------------------|----------------------|-----------------------------------------------------------------|
| 1  |                              |                      |                                                                 |
| 2  |                              |                      |                                                                 |
| 3  |                              |                      |                                                                 |
| 4  | Sample size                  | <a href="#">#14</a>  | Estimated number of participants needed to achieve study 6, 9   |
| 5  |                              |                      |                                                                 |
| 6  |                              |                      | objectives and how it was determined, including clinical and    |
| 7  |                              |                      |                                                                 |
| 8  |                              |                      | statistical assumptions supporting any sample size              |
| 9  |                              |                      |                                                                 |
| 10 |                              |                      | calculations                                                    |
| 11 |                              |                      |                                                                 |
| 12 |                              |                      |                                                                 |
| 13 | Recruitment                  | <a href="#">#15</a>  | Strategies for achieving adequate participant enrolment to 6, 9 |
| 14 |                              |                      |                                                                 |
| 15 |                              |                      |                                                                 |
| 16 |                              |                      | reach target sample size                                        |
| 17 |                              |                      |                                                                 |
| 18 |                              |                      |                                                                 |
| 19 | <b>Methods: Assignment</b>   |                      |                                                                 |
| 20 |                              |                      |                                                                 |
| 21 | <b>of interventions (for</b> |                      |                                                                 |
| 22 |                              |                      |                                                                 |
| 23 | <b>controlled trials)</b>    |                      |                                                                 |
| 24 |                              |                      |                                                                 |
| 25 |                              |                      |                                                                 |
| 26 | Allocation: sequence         | <a href="#">#16a</a> | Method of generating the allocation sequence (eg, 12            |
| 27 |                              |                      |                                                                 |
| 28 | generation                   |                      | computer-generated random numbers), and list of any             |
| 29 |                              |                      |                                                                 |
| 30 |                              |                      | factors for stratification. To reduce predictability of a       |
| 31 |                              |                      |                                                                 |
| 32 |                              |                      | random sequence, details of any planned restriction (eg,        |
| 33 |                              |                      |                                                                 |
| 34 |                              |                      | blocking) should be provided in a separate document that        |
| 35 |                              |                      |                                                                 |
| 36 |                              |                      | is unavailable to those who enrol participants or assign        |
| 37 |                              |                      |                                                                 |
| 38 |                              |                      | interventions                                                   |
| 39 |                              |                      |                                                                 |
| 40 |                              |                      |                                                                 |
| 41 |                              |                      |                                                                 |
| 42 |                              |                      |                                                                 |
| 43 | Allocation                   | <a href="#">#16b</a> | Mechanism of implementing the allocation sequence (eg, 12       |
| 44 |                              |                      |                                                                 |
| 45 | concealment                  |                      | central telephone; sequentially numbered, opaque, sealed        |
| 46 |                              |                      |                                                                 |
| 47 | mechanism                    |                      | envelopes), describing any steps to conceal the sequence        |
| 48 |                              |                      |                                                                 |
| 49 |                              |                      | until interventions are assigned                                |
| 50 |                              |                      |                                                                 |
| 51 |                              |                      |                                                                 |
| 52 |                              |                      |                                                                 |
| 53 | Allocation:                  | <a href="#">#16c</a> | Who will generate the allocation sequence, who will enrol 12    |
| 54 |                              |                      |                                                                 |
| 55 | implementation               |                      | participants, and who will assign participants to               |
| 56 |                              |                      |                                                                 |
| 57 |                              |                      | interventions                                                   |
| 58 |                              |                      |                                                                 |
| 59 |                              |                      |                                                                 |
| 60 |                              |                      |                                                                 |

|    |                        |                      |                                                                |        |
|----|------------------------|----------------------|----------------------------------------------------------------|--------|
| 1  | Blinding (masking)     | <a href="#">#17a</a> | Who will be blinded after assignment to interventions (eg,     | n/a    |
| 2  |                        |                      | trial participants, care providers, outcome assessors, data    |        |
| 3  |                        |                      | analysts), and how                                             |        |
| 4  |                        |                      |                                                                |        |
| 5  |                        |                      |                                                                |        |
| 6  |                        |                      |                                                                |        |
| 7  |                        |                      |                                                                |        |
| 8  | Blinding (masking):    | <a href="#">#17b</a> | If blinded, circumstances under which unblinding is            | n/a    |
| 9  | emergency              |                      | permissible, and procedure for revealing a participant's       |        |
| 10 |                        |                      | allocated intervention during the trial                        |        |
| 11 | unblinding             |                      |                                                                |        |
| 12 |                        |                      |                                                                |        |
| 13 |                        |                      |                                                                |        |
| 14 |                        |                      |                                                                |        |
| 15 |                        |                      |                                                                |        |
| 16 | <b>Methods: Data</b>   |                      |                                                                |        |
| 17 | <b>collection,</b>     |                      |                                                                |        |
| 18 | <b>management, and</b> |                      |                                                                |        |
| 19 | <b>analysis</b>        |                      |                                                                |        |
| 20 |                        |                      |                                                                |        |
| 21 |                        |                      |                                                                |        |
| 22 |                        |                      |                                                                |        |
| 23 |                        |                      |                                                                |        |
| 24 |                        |                      |                                                                |        |
| 25 |                        |                      |                                                                |        |
| 26 | Data collection plan   | <a href="#">#18a</a> | Plans for assessment and collection of outcome, baseline,      | 19, 20 |
| 27 |                        |                      | and other trial data, including any related processes to       |        |
| 28 |                        |                      | promote data quality (eg, duplicate measurements, training     |        |
| 29 |                        |                      | of assessors) and a description of study instruments (eg,      |        |
| 30 |                        |                      | questionnaires, laboratory tests) along with their reliability |        |
| 31 |                        |                      | and validity, if known. Reference to where data collection     |        |
| 32 |                        |                      | forms can be found, if not in the protocol                     |        |
| 33 |                        |                      |                                                                |        |
| 34 |                        |                      |                                                                |        |
| 35 |                        |                      |                                                                |        |
| 36 |                        |                      |                                                                |        |
| 37 |                        |                      |                                                                |        |
| 38 |                        |                      |                                                                |        |
| 39 |                        |                      |                                                                |        |
| 40 |                        |                      |                                                                |        |
| 41 |                        |                      |                                                                |        |
| 42 |                        |                      |                                                                |        |
| 43 | Data collection plan:  | <a href="#">#18b</a> | Plans to promote participant retention and complete follow-    | 19, 20 |
| 44 | retention              |                      | up, including list of any outcome data to be collected for     |        |
| 45 |                        |                      | participants who discontinue or deviate from intervention      |        |
| 46 |                        |                      | protocols                                                      |        |
| 47 |                        |                      |                                                                |        |
| 48 |                        |                      |                                                                |        |
| 49 |                        |                      |                                                                |        |
| 50 |                        |                      |                                                                |        |
| 51 |                        |                      |                                                                |        |
| 52 |                        |                      |                                                                |        |
| 53 | Data management        | <a href="#">#19</a>  | Plans for data entry, coding, security, and storage,           | 19, 20 |
| 54 |                        |                      | including any related processes to promote data quality        |        |
| 55 |                        |                      | (eg, double data entry; range checks for data values).         |        |
| 56 |                        |                      |                                                                |        |
| 57 |                        |                      |                                                                |        |
| 58 |                        |                      |                                                                |        |
| 59 |                        |                      |                                                                |        |
| 60 |                        |                      |                                                                |        |



|    |                            |                                                                                  |        |
|----|----------------------------|----------------------------------------------------------------------------------|--------|
| 1  |                            | Reference to where details of data management                                    |        |
| 2  |                            |                                                                                  |        |
| 3  |                            | procedures can be found, if not in the protocol                                  |        |
| 4  |                            |                                                                                  |        |
| 5  |                            |                                                                                  |        |
| 6  | Statistics: outcomes       | <a href="#">#20a</a> Statistical methods for analysing primary and secondary     | 11, 12 |
| 7  |                            |                                                                                  |        |
| 8  |                            | outcomes. Reference to where other details of the                                |        |
| 9  |                            |                                                                                  |        |
| 10 |                            | statistical analysis plan can be found, if not in the protocol                   |        |
| 11 |                            |                                                                                  |        |
| 12 |                            |                                                                                  |        |
| 13 | Statistics: additional     | <a href="#">#20b</a> Methods for any additional analyses (eg, subgroup and       | 11, 12 |
| 14 |                            |                                                                                  |        |
| 15 | analyses                   | adjusted analyses)                                                               |        |
| 16 |                            |                                                                                  |        |
| 17 |                            |                                                                                  |        |
| 18 | Statistics: analysis       | <a href="#">#20c</a> Definition of analysis population relating to protocol non- | 11, 12 |
| 19 |                            |                                                                                  |        |
| 20 | population and             | adherence (eg, as randomised analysis), and any statistical                      |        |
| 21 |                            |                                                                                  |        |
| 22 | missing data               | methods to handle missing data (eg, multiple imputation)                         |        |
| 23 |                            |                                                                                  |        |
| 24 |                            |                                                                                  |        |
| 25 |                            |                                                                                  |        |
| 26 | <b>Methods: Monitoring</b> |                                                                                  |        |
| 27 |                            |                                                                                  |        |
| 28 |                            |                                                                                  |        |
| 29 | Data monitoring:           | <a href="#">#21a</a> Composition of data monitoring committee (DMC);             | n/a    |
| 30 |                            |                                                                                  |        |
| 31 | formal committee           | summary of its role and reporting structure; statement of                        |        |
| 32 |                            |                                                                                  |        |
| 33 |                            | whether it is independent from the sponsor and competing                         |        |
| 34 |                            |                                                                                  |        |
| 35 |                            | interests; and reference to where further details about its                      |        |
| 36 |                            |                                                                                  |        |
| 37 |                            | charter can be found, if not in the protocol. Alternatively, an                  |        |
| 38 |                            |                                                                                  |        |
| 39 |                            | explanation of why a DMC is not needed                                           |        |
| 40 |                            |                                                                                  |        |
| 41 |                            |                                                                                  |        |
| 42 |                            |                                                                                  |        |
| 43 |                            |                                                                                  |        |
| 44 | Data monitoring:           | <a href="#">#21b</a> Description of any interim analyses and stopping            | n/a    |
| 45 |                            |                                                                                  |        |
| 46 | interim analysis           | guidelines, including who will have access to these interim                      |        |
| 47 |                            |                                                                                  |        |
| 48 |                            | results and make the final decision to terminate the trial                       |        |
| 49 |                            |                                                                                  |        |
| 50 |                            |                                                                                  |        |
| 51 | Harms                      | <a href="#">#22</a> Plans for collecting, assessing, reporting, and managing     | n/a    |
| 52 |                            |                                                                                  |        |
| 53 |                            | solicited and spontaneously reported adverse events and                          |        |
| 54 |                            |                                                                                  |        |
| 55 |                            | other unintended effects of trial interventions or trial                         |        |
| 56 |                            |                                                                                  |        |
| 57 |                            |                                                                                  |        |
| 58 |                            |                                                                                  |        |
| 59 |                            |                                                                                  |        |
| 60 |                            |                                                                                  |        |

|    |                      |                                                                                  |        |
|----|----------------------|----------------------------------------------------------------------------------|--------|
| 1  |                      | conduct                                                                          |        |
| 2  |                      |                                                                                  |        |
| 3  |                      |                                                                                  |        |
| 4  | Auditing             | <a href="#">#23</a> Frequency and procedures for auditing trial conduct, if any, | n/a    |
| 5  |                      | and whether the process will be independent from                                 |        |
| 6  |                      | investigators and the sponsor                                                    |        |
| 7  |                      |                                                                                  |        |
| 8  |                      |                                                                                  |        |
| 9  |                      |                                                                                  |        |
| 10 |                      |                                                                                  |        |
| 11 | <b>Ethics and</b>    |                                                                                  |        |
| 12 |                      |                                                                                  |        |
| 13 | <b>dissemination</b> |                                                                                  |        |
| 14 |                      |                                                                                  |        |
| 15 |                      |                                                                                  |        |
| 16 | Research ethics      | <a href="#">#24</a> Plans for seeking research ethics committee / institutional  | 12     |
| 17 | approval             | review board (REC / IRB) approval                                                |        |
| 18 |                      |                                                                                  |        |
| 19 | Protocol             | <a href="#">#25</a> Plans for communicating important protocol modifications     | n/a    |
| 20 | amendments           | (eg, changes to eligibility criteria, outcomes, analyses) to                     |        |
| 21 |                      | relevant parties (eg, investigators, REC / IRBs, trial                           |        |
| 22 |                      | participants, trial registries, journals, regulators)                            |        |
| 23 |                      |                                                                                  |        |
| 24 | Consent or assent    | <a href="#">#26a</a> Who will obtain informed consent or assent from potential   | 6, 9   |
| 25 |                      | trial participants or authorised surrogates, and how (see                        |        |
| 26 |                      | Item 32)                                                                         |        |
| 27 |                      |                                                                                  |        |
| 28 |                      |                                                                                  |        |
| 29 | Consent or assent:   | <a href="#">#26b</a> Additional consent provisions for collection and use of     | n/a    |
| 30 | ancillary studies    | participant data and biological specimens in ancillary                           |        |
| 31 |                      | studies, if applicable                                                           |        |
| 32 |                      |                                                                                  |        |
| 33 |                      |                                                                                  |        |
| 34 | Confidentiality      | <a href="#">#27</a> How personal information about potential and enrolled        | 19, 20 |
| 35 |                      | participants will be collected, shared, and maintained in                        |        |
| 36 |                      | order to protect confidentiality before, during, and after the                   |        |
| 37 |                      | trial                                                                            |        |
| 38 |                      |                                                                                  |        |
| 39 |                      |                                                                                  |        |
| 40 | Declaration of       | <a href="#">#28</a> Financial and other competing interests for principal        | 14     |
| 41 |                      |                                                                                  |        |
| 42 |                      |                                                                                  |        |
| 43 |                      |                                                                                  |        |
| 44 |                      |                                                                                  |        |
| 45 |                      |                                                                                  |        |
| 46 |                      |                                                                                  |        |
| 47 |                      |                                                                                  |        |
| 48 |                      |                                                                                  |        |
| 49 |                      |                                                                                  |        |
| 50 |                      |                                                                                  |        |
| 51 |                      |                                                                                  |        |
| 52 |                      |                                                                                  |        |
| 53 |                      |                                                                                  |        |
| 54 |                      |                                                                                  |        |
| 55 |                      |                                                                                  |        |
| 56 |                      |                                                                                  |        |
| 57 |                      |                                                                                  |        |
| 58 |                      |                                                                                  |        |
| 59 |                      |                                                                                  |        |
| 60 |                      |                                                                                  |        |

|    |                       |                      |                                                                 |     |
|----|-----------------------|----------------------|-----------------------------------------------------------------|-----|
| 1  | interests             |                      | investigators for the overall trial and each study site         |     |
| 2  |                       |                      |                                                                 |     |
| 3  |                       |                      |                                                                 |     |
| 4  | Data access           | <a href="#">#29</a>  | Statement of who will have access to the final trial dataset,   | 14  |
| 5  |                       |                      | and disclosure of contractual agreements that limit such        |     |
| 6  |                       |                      | access for investigators                                        |     |
| 7  |                       |                      |                                                                 |     |
| 8  |                       |                      |                                                                 |     |
| 9  |                       |                      |                                                                 |     |
| 10 |                       |                      |                                                                 |     |
| 11 | Ancillary and post    | <a href="#">#30</a>  | Provisions, if any, for ancillary and post-trial care, and for  | n/a |
| 12 |                       |                      | compensation to those who suffer harm from trial                |     |
| 13 | trial care            |                      | participation                                                   |     |
| 14 |                       |                      |                                                                 |     |
| 15 |                       |                      |                                                                 |     |
| 16 |                       |                      |                                                                 |     |
| 17 |                       |                      |                                                                 |     |
| 18 |                       |                      |                                                                 |     |
| 19 | Dissemination policy: | <a href="#">#31a</a> | Plans for investigators and sponsor to communicate trial        | 14  |
| 20 |                       |                      | results to participants, healthcare professionals, the public,  |     |
| 21 | trial results         |                      | and other relevant groups (eg, via publication, reporting in    |     |
| 22 |                       |                      | results databases, or other data sharing arrangements),         |     |
| 23 |                       |                      | including any publication restrictions                          |     |
| 24 |                       |                      |                                                                 |     |
| 25 |                       |                      |                                                                 |     |
| 26 |                       |                      |                                                                 |     |
| 27 |                       |                      |                                                                 |     |
| 28 |                       |                      |                                                                 |     |
| 29 |                       |                      |                                                                 |     |
| 30 |                       |                      |                                                                 |     |
| 31 | Dissemination policy: | <a href="#">#31b</a> | Authorship eligibility guidelines and any intended use of       | 14  |
| 32 |                       |                      | professional writers                                            |     |
| 33 | authorship            |                      |                                                                 |     |
| 34 |                       |                      |                                                                 |     |
| 35 |                       |                      |                                                                 |     |
| 36 | Dissemination policy: | <a href="#">#31c</a> | Plans, if any, for granting public access to the full protocol, | n/a |
| 37 |                       |                      | participant-level dataset, and statistical code                 |     |
| 38 | reproducible research |                      |                                                                 |     |
| 39 |                       |                      |                                                                 |     |
| 40 |                       |                      |                                                                 |     |
| 41 |                       |                      |                                                                 |     |
| 42 | <b>Appendices</b>     |                      |                                                                 |     |
| 43 |                       |                      |                                                                 |     |
| 44 |                       |                      |                                                                 |     |
| 45 | Informed consent      | <a href="#">#32</a>  | Model consent form and other related documentation given        | n/a |
| 46 |                       |                      | to participants and authorised surrogates                       |     |
| 47 | materials             |                      |                                                                 |     |
| 48 |                       |                      |                                                                 |     |
| 49 |                       |                      |                                                                 |     |
| 50 | Biological specimens  | <a href="#">#33</a>  | Plans for collection, laboratory evaluation, and storage of     | n/a |
| 51 |                       |                      | biological specimens for genetic or molecular analysis in       |     |
| 52 |                       |                      | the current trial and for future use in ancillary studies, if   |     |
| 53 |                       |                      | applicable                                                      |     |
| 54 |                       |                      |                                                                 |     |
| 55 |                       |                      |                                                                 |     |
| 56 |                       |                      |                                                                 |     |
| 57 |                       |                      |                                                                 |     |
| 58 |                       |                      |                                                                 |     |
| 59 |                       |                      |                                                                 |     |
| 60 |                       |                      |                                                                 |     |

## Notes:

- 1  
2  
3  
4 • 10: 6, 7, 9, 10 The SPIRIT checklist is distributed under the terms of the Creative Commons  
5 Attribution License CC-BY-ND 3.0. This checklist was completed on 20. March 2020 using  
6 <https://www.goodreports.org/>, a tool made by the [EQUATOR Network](#) in collaboration with  
7  
8 [Penelope.ai](#)  
9  
10  
11  
12  
13  
14  
15  
16  
17  
18  
19  
20  
21  
22  
23  
24  
25  
26  
27  
28  
29  
30  
31  
32  
33  
34  
35  
36  
37  
38  
39  
40  
41  
42  
43  
44  
45  
46  
47  
48  
49  
50  
51  
52  
53  
54  
55  
56  
57  
58  
59  
60
